# Supplementary material for: Limitations of WRF land surface models for simulating land use and land cover change in Sub-Saharan Africa and development of an improved model (CLM-AF v. 1.0)
Source: Copernicus journal article supplement (doi:10.5194/gmd-14-3215-2021), 2021-06-03
Supplement: Supplementary file 1 [file gmd-14-3215-2021-supplement.pdf]

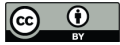

*Supplement of*

**Limitations of WRF land surface models for simulating land use and land cover change in Sub-Saharan Africa and development of an improved model (CLM-AF v. 1.0)**

**Timothy Glotfelty et al.**

*Correspondence to:* Timothy Glotfelty ([twglotfe@email.unc.edu](mailto:twglotfe@email.unc.edu))

The copyright of individual parts of the supplement might differ from the article licence.

### **ST1: Addressing Inconsistencies in CLM-AF PFTs**

In the savanna category, corn is the fourth most abundant PFT indicating some misclassification with croplands. To eliminate this issue of misclassification, the corn contribution to the savanna category is ignored and the fifth most abundant PFT (broad leaf deciduous tropical trees) is used instead. In the broad leaf evergreen forest category, the third and fourth most abundant PFTs are deciduous tropical and temperate trees. To fix this misclassification, the contributions of each type of deciduous tree are added to their evergreen counterparts (i.e., tropical and temperate) to obtain an appropriate weighted total of tropical to temperate trees. After this, all tropical and temperate trees were assumed to be evergreen to match the MODIS category. In the mosaic cropland category, the fourth most abundant PFT is evenly divided between evergreen and deciduous tropical trees. This is addressed by summing the total deciduous and tropical tree amounts and assuming that all trees within this category were represented by evergreen tropical trees, since most mosaic cropland is in proximity to broadleaf evergreen forests.

### **ST2: Subdivision of Bio-Climate Regions**

The central wet (CW) and northeast semi-dry (NESD) bioclimate regions are split into three sub-bioclimate regions. CW is split into central wet north (CWN) and central wet south (CWS) regions, north and south of the equator respectively. The southern portion of Angola that contains the savanna MODIS-IGBP category is further split from the CWS region (CWSA) to better represent the differences in LAI between tropical and subtropical grasses. The NESD region is also split into NESD north (NESDN) and NESD south (NESDS) regions containing the area within the NESD region north and south of 4°N, respectively. To avoid an arbitrary discontinuity in LAI from occurring at 4°N, the portion of the NESDN region that contains open

shrubland around 4°N is further split off into a separate region (NESDSH) with its own LAI profiles. The central moist (CM) region is also split into two sub-bioclimate regions, central moist north (CMN) and central moist south (CMS) that are divided at the equator.

### **ST3: Additional Adjustments to LAI Broad Leaf Evergreen Tree Profiles**

Some additional adjustments were required for the monthly LAI profiles to ensure the best possible match to the satellite derived climatology. The broad leaf evergreen forest MODIS-IGBP category does not differentiate between tropical and temperate evergreen trees leading to an inconsistency with CLM. As mentioned in the previous section, the broad leaf evergreen forest category is split between tropical and temperate evergreen trees, however, the “one size fits all” approach to PFTs in WRF-CLM does not allow this ratio to change throughout the model domain. This is not reflective of actual PFT distributions as regions like the Congo contain only tropical evergreen trees, while regions like South Africa contain only temperate evergreen trees. To correct for the inconsistency, the broad leaf evergreen temperate trees were given the identical monthly LAI profile as tropical trees in the WW, WWN, and CW regions and the broad leaf evergreen tropical trees were given the identical monthly LAI profiles as the temperate trees in the SSD and SM regions.

### **ST4: Additional Details Regarding Moisture Variable Evaluation**

In most regions cloud fraction (CF) NMB and NME compared to MODIS are under 50% across most LSMs (Fig. 8). The areas experiencing the greatest overpredictions and worst performance are those across the northern part of the simulation domain (i.e., ND, ED, NESD, EW, and WSD). This poor performance could result from multiple causes including domain boundary effects, errors in the cloud fraction parameterization, and poor coupling of cloud

fraction parameterization to the cumulus parameterization. Similar CF performance occurs also occurs against CRU (Fig. S7) estimates.

The overprediction of precipitation (PRE) the EW region is likely the result of poorly resolved complex terrain in the Ethiopian Highlands at 36km grid spacing, as this poor performance is common to all WRF LSM simulations. Strong underpredictions in the LVW region are also consistent across LSMs. This is likely due to inaccurate initialization of Lake Victoria's surface temperatures, which has been shown to substantially reduce simulated precipitation in the region (Argent et al., 2015). In contrast, the magnitude of the underpredictions in PRE within the East Africa regions varies more between LSMs. These regions experience the strongest underpredictions with the Noah LSM, likely as a result of insufficient atmospheric instability from the underpredicted surface temperatures. Some East Africa regions (e.g., SESD and EM) also experience considerable underpredictions in CLM-D, likely as a result of the inaccurate LAI seasonal profile underestimating the LAI during these regions' rainy season (DJF). This indicates that accurate seasonal LAI profiles are an important component to obtaining accurate rainfall predictions in these East African regions. The precipitation performance against TRMM observations discussed above (Fig. 8) are also generally comparable to GPCP and CRU estimates (Fig. S5), but TRMM error statistics are generally larger due to its greater horizontal resolution and spatial variability. ist north (CMN) and central moist south (CMS) north and south of 1°N, respectively.



Table S1: Variables Used from ERA-Interim Reanalysis

| Variable                        | Units                      |
|---------------------------------|----------------------------|
| Atmosphere Temperature          | K                          |
| Geopotential Height             | $\text{m}^2 \text{s}^{-2}$ |
| East -West Wind Component (U)   | $\text{m s}^{-1}$          |
| North -South Wind Component (V) | $\text{m s}^{-1}$          |
| Relative Humidity               | %                          |
| Surface Pressure                | Pascal                     |
| Sea-Level Pressure              | Pascal                     |
| Surface Skin Temperature        | K                          |
| Sea Surface Temperature         | K                          |
| Soil Temperature                | K                          |
| Soil Moisture                   | $\text{m}^3 \text{m}^{-3}$ |
| Sea Ice Fraction                | Fraction                   |
| Snow Density                    | $\text{kg m}^{-3}$         |
| Snow Height                     | M                          |

Table S2: Percentage of Plant Functional Types Assigned to MODIS Land Use Categories in the Default CLM

| MODIS Land Use Category              | 1  | 2  | 3  | 4  | 5  | 6  | 7  | 8  | 9  | 10 | 12 | 14 | 16 | 18 | 19 | 20 |
|--------------------------------------|----|----|----|----|----|----|----|----|----|----|----|----|----|----|----|----|
| Bare soil                            | 25 | 5  | 50 | 25 | 26 | 20 | 20 | 20 | -  | 20 | 15 | 15 | 90 | 50 | 60 | 80 |
| Needle Leaf Evergreen Temperate Tree | 75 | -  | -  | -  | 37 | -  | -  | -  | -  | -  | -  | -  | -  | -  | -  | -  |
| Needle Leaf Evergreen Boreal Tree    | -  | -  | -  | -  | -  | -  | -  | -  | -  | -  | -  | -  | -  | 13 | -  | -  |
| Needle Leaf Deciduous Boreal Tree    | -  | -  | 50 | -  | -  | -  | -  | -  | -  | -  | -  | -  | -  | 13 | -  | -  |
| Broad Leaf Evergreen Tropical Tree   | -  | 95 | -  | -  | -  | -  | -  | -  | -  | -  | -  | -  | -  | -  | -  | -  |
| Broad Leaf Evergreen Temperate Tree  | -  | -  | -  | -  | -  | -  | -  | -  | 30 | -  | -  | -  | -  | -  | -  | -  |
| Broad Leaf Deciduous Tropical Tree   | -  | -  | -  | -  | -  | -  | -  | -  | -  | -  | -  | -  | -  | -  | -  | -  |
| Broad Leaf Deciduous Temperate Tree  | -  | -  | -  | 75 | 37 | -  | -  | -  | -  | -  | -  | -  | -  | -  | -  | -  |
| Broad Leaf Deciduous Boreal Tree     | -  | -  | -  | -  | -  | -  | -  | -  | -  | -  | -  | -  | -  | -  | -  | -  |
| Broad Leaf Evergreen Shrub           | -  | -  | -  | -  | -  | 80 | 50 | 80 | -  | -  | -  | -  | -  | -  | -  | -  |
| Broad Leaf Deciduous Temperate Shrub | -  | -  | -  | -  | -  | -  | -  | -  | -  | -  | -  | -  | -  | 24 | -  | -  |
| Broad Leaf Deciduous Boreal Shrub    | -  | -  | -  | -  | -  | -  | -  | -  | -  | -  | -  | -  | 10 | -  | 20 | 10 |
| C3 Artic Grass                       | -  | -  | -  | -  | -  | -  | -  | -  | -  | -  | -  | -  | -  | -  | 20 | 20 |
| C3 Non-Artic Grass                   | -  | -  | -  | -  | -  | -  | -  | -  | -  | 20 | -  | -  | -  | -  | -  | -  |
| C4 Grass                             | -  | -  | -  | -  | -  | -  | 30 | -  | 70 | 60 | -  | 35 | -  | -  | -  | -  |
| Corn                                 | -  | -  | -  | -  | -  | -  | -  | -  | -  | -  | 85 | 50 | -  | -  | -  | -  |
| Wheat                                | -  | -  | -  | -  | -  | -  | -  | -  | -  | -  | -  | -  | -  | -  | -  | -  |

MODIS Land Use Categories: 1 – Evergreen Needle Leaf Forest; 2 – Evergreen Broad Leaf Forest; 3 – Deciduous Needle Leaf Forest; 4 – Deciduous Broad Leaf Forest; 5 – Mixed Forest; 6 – Closed Shrublands; 7 – Open Shrublands; 8 – Woody Savanna; 9 – Savannas; 10 – Grasslands; 12 – Croplands; 14 – Cropland/Natural Mosaic; 16 – Barren/ Sparsely Vegetated; 18 – Wooded Tundra; 19 – Mixed Tundra; 20 – Barren Tundra

Table S3: Default CLM Monthly Leaf Area Index Profiles

| Month                                | 1   | 2   | 3   | 4   | 5   | 6   | 7   | 8   | 9   | 10  | 11  | 12  |
|--------------------------------------|-----|-----|-----|-----|-----|-----|-----|-----|-----|-----|-----|-----|
| Needle Leaf Evergreen Temperate Tree | 4.1 | 4.2 | 4.6 | 4.8 | 4.9 | 5.0 | 4.8 | 4.7 | 4.6 | 4.2 | 4.0 | 4.0 |
| Needle Leaf Evergreen Boreal Tree    | 4.1 | 4.2 | 4.6 | 4.8 | 4.9 | 5.0 | 4.8 | 4.7 | 4.6 | 4.2 | 4.0 | 4.0 |
| Needle Leaf Deciduous Boreal Tree    | 0.0 | 0.0 | 0.0 | 0.6 | 1.2 | 2.0 | 2.6 | 1.7 | 1.0 | 0.5 | 0.2 | 0.0 |
| Broad Leaf Evergreen Tropical Tree   | 4.5 | 4.5 | 4.5 | 4.5 | 4.5 | 4.5 | 4.5 | 4.5 | 4.5 | 4.5 | 4.5 | 4.5 |
| Broad Leaf Evergreen Temperate Tree  | 4.5 | 4.5 | 4.5 | 4.5 | 4.5 | 4.5 | 4.5 | 4.5 | 4.5 | 4.5 | 4.5 | 4.5 |
| Broad Leaf Deciduous Tropical Tree   | 0.8 | 0.7 | 0.4 | 0.5 | 0.5 | 0.7 | 1.7 | 3.0 | 2.5 | 1.6 | 1.0 | 1.0 |
| Broad Leaf Deciduous Temperate Tree  | 0.0 | 0.0 | 0.3 | 1.2 | 3.0 | 4.7 | 4.5 | 3.4 | 1.2 | 0.3 | 0.0 | 0.0 |
| Broad Leaf Deciduous Boreal Tree     | 0.0 | 0.0 | 0.3 | 1.2 | 3.0 | 4.7 | 4.5 | 3.4 | 1.2 | 0.3 | 0.0 | 0.0 |
| Broad Leaf Evergreen Shrub           | 1.0 | 1.0 | 1.0 | 1.0 | 1.0 | 1.0 | 1.0 | 1.0 | 1.0 | 1.0 | 1.0 | 1.0 |
| Broad Leaf Deciduous Temperate Shrub | 0.9 | 0.8 | 0.2 | 0.2 | 0.0 | 0.0 | 0.0 | 0.2 | 0.4 | 0.5 | 0.6 | 0.8 |
| Broad Leaf Deciduous Boreal Shrub    | 0.0 | 0.0 | 0.0 | 0.0 | 0.0 | 0.2 | 1.4 | 1.2 | 0.0 | 0.0 | 0.0 | 0.0 |
| C3 Artic Grass                       | 0.4 | 0.5 | 0.6 | 0.7 | 1.2 | 3.0 | 3.5 | 1.5 | 0.7 | 0.6 | 0.5 | 0.4 |
| C3 Non-Artic Grass                   | 0.0 | 0.0 | 0.0 | 0.0 | 0.0 | 0.2 | 1.4 | 1.2 | 0.0 | 0.0 | 0.0 | 0.0 |
| C4 Grass                             | 0.4 | 0.5 | 0.6 | 0.7 | 1.2 | 3.0 | 3.5 | 1.5 | 0.7 | 0.6 | 0.5 | 0.4 |
| Corn                                 | 0.0 | 0.0 | 0.0 | 0.0 | 1.0 | 2.0 | 3.0 | 3.0 | 1.5 | 0.0 | 0.0 | 0.0 |
| Wheat                                | 0.0 | 0.0 | 0.0 | 0.0 | 1.0 | 2.0 | 3.0 | 3.0 | 1.5 | 0.0 | 0.0 | 0.0 |

Table S4: MODIS-IGBP Land Cover Category Description (Friedl et al., 2002)

| MODIS-IGBP Land Cover Category | Description                                                                                                                                                                                                                       |
|--------------------------------|-----------------------------------------------------------------------------------------------------------------------------------------------------------------------------------------------------------------------------------|
| Evergreen Broad Leaf Forests   | Lands dominated by broad leaf woody vegetation with a percentage cover >60% and height exceeding 2m. Almost all trees and shrubs remain green year round. Canopy is never without foliage.                                        |
| Closed Shrubland               | Lands with woody vegetation less than 2 m tall and with shrub cover >60%. The shrub cover be either evergreen or deciduous.                                                                                                       |
| Open Shrubland                 | Lands with woody vegetation less than 2 m tall and with shrub canopy cover between 10% and 60%. The shrub foliage can be either evergreen or deciduous.                                                                           |
| Woody Savanna                  | Lands with herbaceous and other understory systems, with forest canopy cover between 30% and 60%. The forest cover height exceeds 2 m.                                                                                            |
| Savanna                        | Lands with herbaceous and other understory systems, with forest and canopy cover between 10 and 30%. The forest cover exceeds 2 m.                                                                                                |
| Grasslands                     | Land with herbaceous types of cover. Tree and shrub cover is less than 10%.                                                                                                                                                       |
| Cropland                       | Lands covered with temporary crops followed by harvest and bare soil periods (e.g., single and multiple cropping systems). Note that perennial woody crops will be classified as the appropriate forest or shrub land cover type. |
| Mosaic Cropland                | Lands with a mosaic of croplands, forests, shrubland, and grasslands in which no one component comprises more than 60% of the landscape.                                                                                          |

Table S5: Updated CLM-AF Monthly Leaf Area Index Profiles for Broad Leaf Evergreen Tropical Trees

| Region           | Jan. | Feb. | Mar. | Apr. | May | Jun. | Jul. | Aug. | Sep. | Oct. | Nov. | Dec. |
|------------------|------|------|------|------|-----|------|------|------|------|------|------|------|
| EW               | 4.4  | 4.5  | 4.7  | 5.1  | 5.4 | 5.3  | 5.2  | 5.2  | 5.3  | 5.4  | 5.2  | 4.7  |
| WW               | 4.9  | 5.2  | 5.3  | 5.6  | 5.6 | 5.7  | 5.7  | 5.8  | 5.7  | 5.6  | 5.4  | 5.0  |
| CW (N,S,SA)      | 5.3  | 5.7  | 5.8  | 5.9  | 5.6 | 5.1  | 5.0  | 5.2  | 5.7  | 5.8  | 5.7  | 5.4  |
| WWN              | 3.3  | 3.5  | 3.7  | 4.2  | 4.3 | 4.2  | 4.3  | 4.5  | 4.5  | 4.3  | 4.3  | 3.9  |
| CM (S)           | 5.4  | 4.9  | 5.0  | 5.6  | 6.0 | 5.7  | 5.2  | 5.2  | 5.5  | 5.7  | 5.9  | 5.7  |
| LVW              | 4.8  | 4.5  | 4.6  | 5.1  | 5.4 | 5.3  | 5.0  | 5.0  | 5.2  | 5.2  | 5.3  | 5.2  |
| EM <sup>60</sup> | 3.1  | 3.2  | 3.3  | 3.4  | 3.4 | 2.9  | 2.6  | 2.6  | 2.6  | 2.5  | 2.5  | 2.8  |
| MAD              | 5.8  | 5.8  | 5.7  | 5.1  | 4.6 | 4.3  | 4.3  | 4.7  | 5.4  | 5.7  | 5.7  | 5.7  |

<sup>60</sup>: Profile generated using 60% of grid cell threshold.

Table S6: Updated CLM-AF Monthly Leaf Area Index Profiles for Broad Leaf Evergreen Temperate Trees

| Region           | Jan. | Feb. | Mar. | Apr. | May. | Jun. | Jul. | Aug. | Sep. | Oct. | Nov. | Dec. |
|------------------|------|------|------|------|------|------|------|------|------|------|------|------|
| EW               | 4.4  | 4.6  | 4.9  | 5.3  | 5.4  | 5.2  | 5.2  | 5.3  | 5.4  | 5.4  | 5.2  | 4.7  |
| CM (S)           | 3.3  | 3.4  | 3.4  | 3.4  | 3.3  | 3.2  | 3.0  | 2.9  | 2.8  | 2.8  | 3.0  | 3.2  |
| LVW              | 5.0  | 4.9  | 5.0  | 5.2  | 5.2  | 5.0  | 4.9  | 5.0  | 5.0  | 5.0  | 5.1  | 5.0  |
| EM               | 3.5  | 3.6  | 3.5  | 3.3  | 3.0  | 2.5  | 2.2  | 2.3  | 2.5  | 2.4  | 2.7  | 3.1  |
| MAD              | 5.0  | 5.1  | 4.8  | 4.3  | 3.9  | 3.6  | 3.6  | 3.7  | 4.4  | 4.9  | 5.0  | 4.9  |
| SSD              | 2.3  | 2.1  | 2.0  | 1.6  | 1.5  | 1.4  | 1.4  | 1.5  | 1.8  | 2.1  | 2.3  | 2.3  |
| SM <sup>60</sup> | 2.9  | 2.9  | 2.6  | 2.2  | 1.7  | 1.5  | 1.3  | 1.4  | 1.5  | 1.7  | 2.2  | 2.7  |

<sup>60</sup>: Profile generated using 60% of grid cell threshold.

Table S7: Updated CLM-AF Monthly Leaf Area Index Profiles for Broad Leaf Deciduous Tropical Trees

| Region                     | Jan. | Feb. | Mar. | Apr. | May | Jun. | Jul. | Aug. | Sep. | Oct. | Nov. | Dec. |
|----------------------------|------|------|------|------|-----|------|------|------|------|------|------|------|
| WSD                        | 0.6  | 0.6  | 0.5  | 0.6  | 0.7 | 1.1  | 1.6  | 1.9  | 1.9  | 1.6  | 1.0  | 0.7  |
| NESD (N)                   | 0.7  | 0.7  | 0.7  | 0.7  | 0.9 | 1.2  | 1.7  | 1.9  | 1.9  | 1.5  | 1.1  | 0.8  |
| NESD (S, SH) <sup>60</sup> | 2.1  | 2.0  | 1.9  | 2.2  | 2.3 | 2.1  | 2.0  | 1.8  | 1.5  | 1.4  | 1.8  | 2.1  |
| EW                         | 0.3  | 0.3  | 0.3  | 0.3  | 0.3 | 0.4  | 0.8  | 1.1  | 1.2  | 0.9  | 0.6  | 0.4  |
| WM                         | 1.3  | 1.3  | 1.5  | 1.8  | 2.0 | 2.3  | 2.6  | 2.8  | 2.8  | 2.6  | 2.1  | 1.7  |
| WW                         | 2.3  | 2.2  | 2.2  | 2.3  | 2.5 | 3.0  | 3.4  | 3.6  | 3.6  | 3.6  | 3.3  | 2.6  |
| CW (N)                     | 3.1  | 3.3  | 3.4  | 3.6  | 3.6 | 3.6  | 3.6  | 3.8  | 3.9  | 3.7  | 3.5  | 3.3  |
| CW(S,SA)                   | 2.9  | 2.9  | 3.0  | 2.7  | 1.8 | 1.3  | 1.0  | 1.1  | 1.6  | 2.1  | 2.7  | 2.9  |
| SESD                       | 2.6  | 2.7  | 2.7  | 2.7  | 2.3 | 1.9  | 1.8  | 1.6  | 1.5  | 1.6  | 1.9  | 2.4  |
| MAD                        | 1.9  | 2.1  | 2.1  | 1.7  | 1.2 | 0.8  | 0.7  | 0.7  | 0.7  | 0.7  | 0.8  | 1.3  |
| SSD <sup>60</sup>          | 1.5  | 1.5  | 1.4  | 1.1  | 0.7 | 0.4  | 0.3  | 0.4  | 0.4  | 0.5  | 0.8  | 1.2  |
| SM <sup>60</sup>           | 3.5  | 3.7  | 3.6  | 3.3  | 3.1 | 2.9  | 2.7  | 2.7  | 2.8  | 3.0  | 3.2  | 3.4  |

<sup>60</sup>: Profile generated using 60% of grid cell threshold.

Table S8: Updated CLM-AF Monthly Leaf Area Index Profiles for Broad Leaf Deciduous Temperate Shrub

| Region                  | Jan. | Feb. | Mar. | Apr. | May | Jun. | Jul. | Aug. | Sep. | Oct. | Nov. | Dec. |
|-------------------------|------|------|------|------|-----|------|------|------|------|------|------|------|
| ED <sup>60</sup>        | 0.3  | 0.2  | 0.2  | 0.4  | 0.5 | 0.4  | 0.2  | 0.2  | 0.2  | 0.4  | 0.5  | 0.5  |
| WSD <sup>60</sup>       | 0.4  | 0.4  | 0.4  | 0.4  | 0.4 | 0.7  | 1.3  | 1.7  | 1.7  | 1.3  | 0.7  | 0.5  |
| NESD (N)                | 0.3  | 0.2  | 0.3  | 0.3  | 0.6 | 1.2  | 1.7  | 1.9  | 2.0  | 2.0  | 1.5  | 0.7  |
| NESD (S)                | 0.4  | 0.4  | 0.4  | 0.9  | 1.2 | 0.7  | 0.5  | 0.4  | 0.4  | 0.9  | 1.1  | 0.8  |
| NESD (SH) <sup>60</sup> | 0.3  | 0.3  | 0.3  | 0.4  | 0.6 | 0.4  | 0.3  | 0.3  | 0.3  | 0.4  | 0.5  | 0.4  |
| CW (S) <sup>60</sup>    | 0.5  | 0.6  | 0.7  | 0.7  | 0.5 | 0.4  | 0.3  | 0.3  | 0.3  | 0.3  | 0.3  | 0.4  |
| CW (SA) <sup>60</sup>   | 0.8  | 1.0  | 1.1  | 1.1  | 0.9 | 0.7  | 0.5  | 0.5  | 0.5  | 0.5  | 0.6  | 0.8  |
| SESD <sup>60</sup>      | 0.7  | 0.7  | 0.6  | 0.6  | 0.4 | 0.3  | 0.2  | 0.2  | 0.2  | 0.3  | 0.4  | 0.6  |
| MAD <sup>60</sup>       | 1.0  | 1.1  | 1.1  | 1.0  | 0.8 | 0.6  | 0.5  | 0.4  | 0.4  | 0.4  | 0.5  | 0.7  |
| SD <sup>60</sup>        | 0.3  | 0.3  | 0.2  | 0.2  | 0.2 | 0.3  | 0.3  | 0.4  | 0.4  | 0.4  | 0.3  | 0.3  |
| SSD <sup>60</sup>       | 0.5  | 0.6  | 0.6  | 0.5  | 0.3 | 0.2  | 0.2  | 0.2  | 0.2  | 0.3  | 0.4  | 0.5  |
| SM <sup>60</sup>        | 0.9  | 0.9  | 0.8  | 0.6  | 0.4 | 0.3  | 0.3  | 0.3  | 0.3  | 0.4  | 0.6  | 0.8  |

<sup>60</sup>: Profile generated using 60% of grid cell threshold.



Table S9: Updated CLM-AF Monthly Leaf Area Index Profiles for C3 Non-Artic Grass

| Region                  | Jan. | Feb. | Mar. | Apr. | May | Jun. | Jul. | Aug. | Sep. | Oct. | Nov. | Dec. |
|-------------------------|------|------|------|------|-----|------|------|------|------|------|------|------|
| WSD <sup>60</sup>       | 0.6  | 0.5  | 0.5  | 0.5  | 0.8 | 1.2  | 1.6  | 1.8  | 1.9  | 1.6  | 0.9  | 0.7  |
| NESD (N)                | 0.4  | 0.4  | 0.4  | 0.6  | 0.8 | 0.9  | 1.3  | 1.6  | 1.6  | 1.2  | 0.8  | 0.5  |
| NESD (S)                | 1.4  | 1.6  | 1.6  | 1.6  | 1.2 | 0.8  | 0.6  | 0.6  | 0.5  | 0.5  | 0.6  | 0.9  |
| NESD (SH) <sup>60</sup> | 1.0  | 0.9  | 0.8  | 1.2  | 1.3 | 1.0  | 0.8  | 0.9  | 0.9  | 0.9  | 1.2  | 1.2  |
| EW                      | 0.5  | 0.4  | 0.4  | 0.5  | 0.6 | 0.8  | 1.3  | 1.8  | 1.9  | 1.5  | 1.0  | 0.6  |
| WW <sup>60</sup>        | 1.0  | 1.0  | 1.1  | 1.4  | 1.6 | 2.1  | 2.4  | 2.5  | 2.6  | 2.4  | 1.8  | 1.2  |
| CW (N) <sup>60</sup>    | 1.4  | 1.3  | 1.5  | 2.1  | 2.6 | 2.7  | 2.7  | 2.7  | 2.6  | 2.6  | 2.3  | 1.8  |
| CW (S)                  | 1.8  | 1.8  | 1.8  | 1.8  | 1.7 | 1.3  | 1.1  | 1.2  | 1.5  | 1.8  | 1.9  | 1.9  |
| CW (SA)                 | 1.4  | 1.5  | 1.6  | 1.5  | 1.2 | 0.8  | 0.6  | 0.6  | 0.6  | 0.8  | 1.1  | 1.3  |
| WWN <sup>60</sup>       | 0.5  | 0.5  | 0.7  | 1.3  | 2.0 | 2.3  | 2.3  | 2.3  | 2.3  | 2.2  | 1.5  | 0.8  |
| CM (N) <sup>60</sup>    | 1.0  | 0.9  | 0.9  | 1.3  | 1.6 | 1.7  | 1.7  | 1.7  | 1.6  | 1.4  | 1.4  | 1.2  |
| CM (S)                  | 1.6  | 1.6  | 1.7  | 1.8  | 1.6 | 1.1  | 0.8  | 0.8  | 0.8  | 0.7  | 0.9  | 1.3  |
| LVW                     | 1.4  | 1.2  | 1.3  | 1.5  | 1.8 | 1.7  | 1.6  | 1.5  | 1.5  | 1.4  | 1.5  | 1.5  |
| EM                      | 1.5  | 1.6  | 1.6  | 1.5  | 1.2 | 1.0  | 0.8  | 0.7  | 0.7  | 0.7  | 0.9  | 1.2  |
| SESD                    | 1.6  | 1.6  | 1.6  | 1.3  | 1.0 | 0.7  | 0.6  | 0.5  | 0.6  | 0.6  | 0.8  | 1.3  |
| MAD                     | 1.3  | 1.6  | 1.6  | 1.5  | 1.1 | 0.9  | 0.7  | 0.6  | 0.6  | 0.6  | 0.8  | 1.0  |
| SD <sup>60</sup>        | 0.3  | 0.3  | 0.4  | 0.3  | 0.3 | 0.3  | 0.3  | 0.3  | 0.3  | 0.3  | 0.3  | 0.3  |
| SSD                     | 1.0  | 1.2  | 1.1  | 0.9  | 0.6 | 0.4  | 0.4  | 0.3  | 0.3  | 0.4  | 0.6  | 0.8  |
| SM                      | 1.8  | 1.9  | 1.6  | 1.2  | 0.7 | 0.5  | 0.4  | 0.4  | 0.5  | 0.8  | 1.2  | 1.6  |

<sup>60</sup>: Profile generated using 60% of grid cell threshold.

Table S10: Updated CLM-AF Monthly Leaf Area Index Profiles for C4 Grass

| Region                  | Jan. | Feb. | Mar. | Apr. | May | Jun. | Jul. | Aug. | Sep. | Oct. | Nov. | Dec. |
|-------------------------|------|------|------|------|-----|------|------|------|------|------|------|------|
| ND <sup>60</sup>        | 0.2  | 0.1  | 0.1  | 0.1  | 0.1 | 0.2  | 0.3  | 0.4  | 0.5  | 0.3  | 0.2  | 0.2  |
| WSD                     | 0.4  | 0.4  | 0.4  | 0.4  | 0.5 | 0.9  | 1.3  | 1.7  | 1.7  | 1.3  | 0.8  | 0.5  |
| NESD (N)                | 0.4  | 0.3  | 0.3  | 0.4  | 0.6 | 1.0  | 1.5  | 1.9  | 1.9  | 1.5  | 0.9  | 0.6  |
| NESD (S)                | 1.2  | 1.0  | 1.0  | 1.3  | 1.4 | 1.2  | 1.1  | 0.9  | 0.8  | 0.9  | 1.2  | 1.3  |
| NESD (SH) <sup>60</sup> | 0.3  | 0.3  | 0.2  | 0.4  | 0.4 | 0.3  | 0.4  | 0.5  | 0.4  | 0.4  | 0.4  | 0.4  |
| EW                      | 0.6  | 0.4  | 0.5  | 0.8  | 1.4 | 2.0  | 2.3  | 2.6  | 2.5  | 2.2  | 1.6  | 1.0  |
| WM                      | 0.5  | 0.6  | 0.6  | 0.9  | 1.2 | 1.5  | 1.8  | 2.0  | 2.0  | 1.9  | 1.2  | 0.7  |
| WW                      | 0.7  | 0.7  | 0.9  | 1.1  | 1.4 | 1.8  | 2.1  | 2.2  | 2.3  | 2.1  | 1.4  | 0.9  |
| CW (N)                  | 0.5  | 0.5  | 0.6  | 0.8  | 1.1 | 1.7  | 2.2  | 2.3  | 2.4  | 2.0  | 1.2  | 0.6  |
| CW (S)                  | 2.1  | 2.1  | 2.2  | 2.3  | 2.0 | 1.4  | 1.1  | 1.2  | 1.4  | 1.6  | 1.9  | 2.1  |
| CW (SA)                 | 1.5  | 1.7  | 1.8  | 1.7  | 1.3 | 0.9  | 0.7  | 0.7  | 0.7  | 0.8  | 1.1  | 1.5  |
| WWN                     | 0.5  | 0.6  | 0.7  | 1.0  | 1.5 | 1.8  | 2.0  | 2.1  | 2.1  | 2.1  | 1.4  | 0.8  |
| CM (N)                  | 0.6  | 0.6  | 0.6  | 0.9  | 1.4 | 2.0  | 2.3  | 2.5  | 2.2  | 1.7  | 1.1  | 0.7  |
| CM (S)                  | 1.7  | 1.7  | 1.7  | 1.7  | 1.6 | 1.2  | 1.1  | 0.9  | 0.8  | 0.8  | 1.1  | 1.5  |
| LVW <sup>60</sup>       | 0.8  | 0.7  | 0.8  | 1.1  | 1.3 | 1.3  | 1.3  | 1.3  | 1.2  | 1.2  | 1.2  | 0.9  |
| EM                      | 1.9  | 2.1  | 2.2  | 2.2  | 1.8 | 1.3  | 1.0  | 0.8  | 0.7  | 0.7  | 0.8  | 1.2  |
| SESD                    | 1.8  | 1.9  | 1.9  | 1.6  | 1.1 | 0.8  | 0.7  | 0.6  | 0.6  | 0.6  | 0.8  | 1.4  |
| MAD                     | 1.5  | 1.6  | 1.6  | 1.3  | 1.0 | 0.7  | 0.6  | 0.6  | 0.6  | 0.6  | 0.7  | 1.1  |
| SSD                     | 1.1  | 1.2  | 1.1  | 1.0  | 0.7 | 0.5  | 0.4  | 0.4  | 0.4  | 0.4  | 0.6  | 0.9  |

<sup>60</sup>: Profile generated using 60% of grid cell threshold.

Table S11: Updated CLM-AF Monthly Leaf Area Index Profiles for Corn

| Region               | Jan. | Feb. | Mar. | Apr. | May | Jun. | Jul. | Aug. | Sep. | Oct. | Nov. | Dec. |
|----------------------|------|------|------|------|-----|------|------|------|------|------|------|------|
| ND                   | 0.1  | 0.1  | 0.1  | 0.1  | 0.1 | 0.2  | 0.2  | 0.3  | 0.3  | 0.2  | 0.1  | 0.1  |
| WSD                  | 0.2  | 0.2  | 0.1  | 0.2  | 0.2 | 0.3  | 0.4  | 0.6  | 0.6  | 0.5  | 0.3  | 0.2  |
| NESD (N)             | 0.2  | 0.2  | 0.3  | 0.5  | 0.6 | 0.5  | 0.5  | 0.6  | 0.6  | 0.5  | 0.5  | 0.3  |
| NESD (S, SH)         | 0.4  | 0.4  | 0.4  | 0.7  | 1.0 | 1.0  | 0.9  | 1.0  | 0.9  | 0.7  | 0.6  | 0.5  |
| EW <sup>60</sup>     | 0.4  | 0.5  | 0.5  | 0.6  | 0.6 | 0.6  | 0.8  | 1.2  | 1.3  | 1.1  | 0.7  | 0.5  |
| WM                   | 0.6  | 0.6  | 0.7  | 0.9  | 1.1 | 1.4  | 1.7  | 1.8  | 1.9  | 1.7  | 1.3  | 0.9  |
| WW                   | 0.6  | 0.8  | 1.1  | 1.6  | 1.9 | 2.0  | 2.2  | 2.2  | 2.2  | 2.3  | 1.5  | 0.8  |
| CW (N) <sup>60</sup> | 0.9  | 1.0  | 1.2  | 1.7  | 2.3 | 2.6  | 2.7  | 2.6  | 2.6  | 2.5  | 1.8  | 1.1  |
| WWN                  | 0.7  | 0.8  | 1.0  | 1.3  | 1.7 | 1.9  | 2.0  | 2.1  | 2.1  | 2.0  | 1.6  | 1.0  |
| CM (N)               | 0.6  | 0.5  | 0.7  | 1.4  | 2.2 | 2.5  | 2.5  | 2.6  | 2.6  | 2.2  | 1.7  | 1.0  |
| CM (S)               | 1.6  | 1.4  | 1.4  | 1.7  | 1.9 | 1.4  | 1.0  | 0.9  | 1.1  | 1.5  | 1.8  | 1.8  |
| LVW                  | 1.1  | 1.0  | 1.1  | 1.5  | 1.8 | 1.7  | 1.6  | 1.6  | 1.5  | 1.5  | 1.5  | 1.2  |
| SESD <sup>60</sup>   | 1.8  | 1.9  | 1.9  | 1.7  | 1.3 | 0.9  | 0.8  | 0.6  | 0.6  | 0.6  | 0.8  | 1.3  |
| SSD                  | 0.6  | 0.6  | 0.6  | 0.5  | 0.4 | 0.5  | 0.7  | 0.8  | 0.7  | 0.5  | 0.4  | 0.5  |
| SM <sup>60</sup>     | 2.1  | 2.2  | 2.0  | 1.7  | 1.3 | 0.9  | 0.8  | 0.8  | 0.8  | 1.2  | 1.7  | 2.0  |

<sup>60</sup>: Profile generated using 60% of grid cell threshold.

Table S12. Dinamica EGO Explanatory Variables

| Type    | Group                       | Variable                           | Resolution | Product Acronym | Source                         |                                                                                                                                                                           |
|---------|-----------------------------|------------------------------------|------------|-----------------|--------------------------------|---------------------------------------------------------------------------------------------------------------------------------------------------------------------------|
| Static  | Biophysical conditions      | Elevation (DEM)                    | ~ 1 km     | GTOPO30         | USGS                           | Global 30 Arc-Second Elevation (GTOPO30) Digital Object Identifier (DOI) number: /10.5066/F7DF6PQS                                                                        |
|         |                             | Slope                              | ~ 1 km     |                 | Derived from DEM               |                                                                                                                                                                           |
|         |                             | Aspect                             | ~ 1 km     |                 | Derived from DEM               |                                                                                                                                                                           |
|         |                             | Bulk density                       | ~ 1 km     | BLDFIE_M_sl1    | ISRIC - World Soil Information |                                                                                                                                                                           |
|         |                             | Clay content                       | ~ 1 km     | CLYPPT_M_sl1    | ISRIC - World Soil Information |                                                                                                                                                                           |
|         |                             | Sand content                       | ~ 1 km     | SNDPPT_M_sl1    | ISRIC - World Soil Information |                                                                                                                                                                           |
|         |                             | Silt content                       | ~ 1 km     | SLTPPT_M_sl1    | ISRIC - World Soil Information |                                                                                                                                                                           |
|         |                             | Soil organic carbon content        | ~ 1 km     | ORCDRC_M_sl1    | ISRIC - World Soil Information |                                                                                                                                                                           |
|         | Land status                 | Protected areas                    |            | WDPA            | UCN and UNEP                   | <a href="https://www.protectedplanet.net/">https://www.protectedplanet.net/</a>                                                                                           |
|         | Demography                  | Population density                 | ~ 1 km     | GPWv4           | SEDAC                          | <a href="https://sedac.ciesin.columbia.edu/data/collection/gpw-v4">https://sedac.ciesin.columbia.edu/data/collection/gpw-v4</a>                                           |
|         | Infrastructure              | Roads                              |            | GPWv4           | SEDAC                          | <a href="https://sedac.ciesin.columbia.edu/data/collection/gpw-v4">https://sedac.ciesin.columbia.edu/data/collection/gpw-v4</a>                                           |
|         |                             | Settlements                        |            |                 | SEDAC                          | <a href="https://sedac.ciesin.columbia.edu/data/set/groads-global-roads-open-access-v1">https://sedac.ciesin.columbia.edu/data/set/groads-global-roads-open-access-v1</a> |
| Dynamic | Distance to LULC categories | Evergreen Broadleaf forest         |            |                 |                                |                                                                                                                                                                           |
|         |                             | Open shrublands                    |            |                 |                                |                                                                                                                                                                           |
|         |                             | Woody savannas                     |            |                 |                                |                                                                                                                                                                           |
|         |                             | Savannas                           |            |                 |                                |                                                                                                                                                                           |
|         |                             | Grasslands                         |            |                 |                                |                                                                                                                                                                           |
|         |                             | Croplands                          |            |                 |                                |                                                                                                                                                                           |
|         |                             | Cropland/natural vegetation mosaic |            |                 |                                |                                                                                                                                                                           |
|         |                             | Barren or sparsely vegetated       |            |                 |                                |                                                                                                                                                                           |
|         |                             | Waterbodies                        |            |                 |                                |                                                                                                                                                                           |
|         |                             |                                    |            |                 |                                |                                                                                                                                                                           |

Table S13. Comparison of Noah and Satellite Derived Albedo values for MODIS-IGBP categories

| MODIS-IGBP Category | Noah  | Houldcroft et al. (2009) |
|---------------------|-------|--------------------------|
| 1                   | 12    | 9.2                      |
| 2                   | 12    | 13.9                     |
| 3                   | 14–15 | 10.3                     |
| 4                   | 16–17 | 13.3                     |
| 5                   | 17–25 | 11.2                     |
| 6                   | 25–30 | 13.4                     |
| 7                   | 22–30 | 16.1                     |
| 8                   | 25–30 | 13.1                     |
| 9                   | 20    | 15.5                     |
| 10                  | 19–23 | 16.8                     |
| 11                  | 14    | 10.2                     |
| 12                  | 17–23 | 16.5                     |
| 13                  | 15    | 14.9                     |
| 14                  | 18–23 | 15.8                     |

Table S14. Noah-MP LAI Seasonal Profiles for each MODIS-IGBP Category

[illegible]

Table S15. Noah LAI Maximum and Minimum Values for each MODIS-IGBP Category

| MODIS-IGBP Category          | Min. | Max. |
|------------------------------|------|------|
| Evergreen Needle Leaf Forest | 5.00 | 6.49 |
| Evergreen Broad Leaf Forest  | 3.08 | 6.48 |
| Deciduous Needle Leaf Forest | 1.00 | 5.16 |
| Deciduous Broad Leaf Forest  | 1.85 | 3.31 |
| Mixed Forest                 | 2.80 | 5.50 |
| Closed Shrubland             | 0.50 | 3.66 |
| Open Shrubland               | 0.60 | 2.60 |
| Woody Savanna                | 0.50 | 3.66 |
| Savannas                     | 0.50 | 3.66 |
| Grasslands                   | 0.52 | 2.90 |
| Permanent Wetlands           | 1.75 | 5.72 |
| Cropland                     | 1.56 | 5.68 |
| Urban and Built              | 1.00 | 1.00 |
| Cropland/Natural Vegetation  | 2.29 | 4.29 |
| Mosaic                       |      |      |
| Ice                          | 0.01 | 0.01 |
| Barren/Sparsely Vegetated    | 0.10 | 0.75 |
| Water                        | 0.01 | 0.01 |
| Wooded Tundra                | 0.41 | 3.35 |
| Mixed Tundra                 | 0.41 | 3.35 |
| Barren Tundra                | 0.41 | 3.35 |

Table S16: Annual Average Surface Radiative Flux Change ( $\text{W m}^{-2}$ ) in WRF Grid Cells that experience LULCCs between 2001 and 2015 with CLM-AF

|                                    | USRS  |       | SWDOWN |       | ULRS |       | GLW  |       |
|------------------------------------|-------|-------|--------|-------|------|-------|------|-------|
| Transition                         | Day   | Night | Day    | Night | Day  | Night | Day  | Night |
| <b>Agricultural Expansion</b> *    | 1.6   | -     | 0.4    | -     | 4.0  | 1.0   | 0.0  | 0.2   |
| 10 to 12                           | 2.1   | -     | -0.3   | -     | 3.3  | 0.0   | 0.0  | 0.0   |
| 2 to 14                            | 11.9  | -     | 2.3    | -     | 19.4 | 10.9  | 0.4  | 1.0   |
| 8 to 14                            | 3.1   | -     | 0.9    | -     | 3.5  | 1.2   | -0.1 | 0.3   |
| 10 to 14                           | -4.4  | -     | -2.3   | -     | 3.4  | -1.5  | 0.4  | -0.1  |
| <b>Deforestation/Degradation</b> * | 7.2   | -     | 2.4    | -     | 1.3  | 2.7   | -0.4 | 0.1   |
| 8 to 9                             | 4.3   | -     | 1.2    | -     | 3.5  | 1.3   | -0.3 | 0.0   |
| 9 to 7                             | 5.9   | -     | 2.3    | -     | -0.8 | 1.5   | -0.4 | 0.1   |
| 9 to 10                            | 20.0  | -     | 7.2    | -     | -7.9 | 8.8   | -1.2 | 0.4   |
| <b>Greening</b> *                  | -11.1 | -     | -2.2   | -     | 4.8  | -6.8  | -0.2 | -0.6  |
| 9 to 8                             | -3.4  | -     | 0.7    | -     | -2.6 | -1.0  | -0.2 | -0.4  |
| 10 to 9                            | -0.4  | -     | -4.6   | -     | 0.3  | -3.4  | 0.8  | -0.7  |
| 16 to 7                            | -14.7 | -     | -6.0   | -     | 20.4 | -8.8  | -0.1 | -0.7  |
| 16 to 10                           | -37.9 | -     | -7.1   | -     | 26.5 | -23.0 | -0.6 | -1.5  |

\*: Shows average difference for a broad class of LULCC followed by the average difference in the major MODIS LULC transitions that comprise that class. MODIS Land Use Categories: 2 – Evergreen Broad Leaf Forest; 7 – Open Shrublands; 8 – Woody Savanna; 9 – Savannas; 10 – Grasslands; 12 – Croplands; 14 – Cropland/Natural Mosaic; 16 – Barren/ Sparsely Vegetated.



Table S17: Annual Average Surface Radiative Flux Change ( $\text{W m}^{-2}$ ) in WRF Grid Cells that experience LULCCs between 2001 and 2015 with Noah-MP

| Transition                         | USRS  |       | SWDOWN |       | ULRS |       | GLW  |       |
|------------------------------------|-------|-------|--------|-------|------|-------|------|-------|
|                                    | Day   | Night | Day    | Night | Day  | Night | Day  | Night |
| <b>Agricultural Expansion</b> *    | 22.8  | -     | 8.0    | -     | 4.7  | 1.1   | -0.9 | 0.0   |
| 10 to 12                           | -0.5  | -     | 0.2    | -     | 2.4  | 0.7   | -0.1 | 0.1   |
| 2 to 14                            | 25.2  | -     | 10.6   | -     | 13.5 | 6.0   | -0.4 | 0.4   |
| 8 to 14                            | 33.3  | -     | 12.4   | -     | 4.9  | 0.8   | -1.5 | -0.1  |
| 10 to 14                           | -0.7  | -     | 0.4    | -     | 0.8  | 0.4   | -0.1 | 0.0   |
| <b>Deforestation/Degradation</b> * | 9.1   | -     | 1.9    | -     | 1.6  | -0.1  | -0.3 | -0.1  |
| 8 to 9                             | 9.7   | -     | 2.3    | -     | -0.1 | -0.1  | -0.3 | -0.1  |
| 9 to 7                             | -3.1  | -     | -2.1   | -     | 5.6  | -0.9  | -0.1 | -0.3  |
| 9 to 10                            | 20.7  | -     | 4.4    | -     | 2.3  | -0.3  | -0.6 | -0.1  |
| <b>Greening</b> *                  | -6.3  | -     | -1.1   | -     | -3.7 | -0.9  | 0.0  | -0.1  |
| 9 to 8                             | -8.9  | -     | -1.9   | -     | -0.1 | -0.1  | 0.1  | -0.2  |
| 10 to 9                            | -25.2 | -     | -7.5   | -     | -3.4 | -0.5  | 0.7  | -0.4  |
| 16 to 7                            | -5.5  | -     | -1.2   | -     | -4.0 | -0.6  | 0.1  | 0.2   |
| 16 to 10                           | 1.6   | -     | 0.6    | -     | -5.1 | -1.9  | -0.2 | 0.1   |

\*: Shows average difference for a broad class of LULCC followed by the average difference in the major MODIS LULC transitions that comprise that class. MODIS Land Use Categories: 2 – Evergreen Broad Leaf Forest; 7 – Open Shrublands; 8 – Woody Savanna; 9 – Savannas; 10 – Grasslands; 12 – Croplands; 14 – Cropland/Natural Mosaic; 16 – Barren/ Sparsely Vegetated.

Table S18: Annual Average Surface Radiative Flux Change ( $\text{W m}^{-2}$ ) in WRF Grid Cells that experience LULCCs between 2001 and 2015 with CLM-D

| Transition                         | USRS  |       | SWDOWN |       | ULRS  |       | GLW  |       |
|------------------------------------|-------|-------|--------|-------|-------|-------|------|-------|
|                                    | Day   | Night | Day    | Night | Day   | Night | Day  | Night |
| <b>Agricultural Expansion</b> *    | 17.4  | -     | 6.2    | -     | -10.5 | 3.8   | -0.6 | 0.3   |
| 10 to 12                           | 3.3   | -     | 1.4    | -     | -11.6 | 8.2   | 0.1  | 0.4   |
| 2 to 14                            | 12.9  | -     | 5.0    | -     | 11.4  | 11.4  | 0.0  | 1.0   |
| 8 to 14                            | 29.8  | -     | 9.4    | -     | -15.8 | 1.3   | -0.9 | 0.2   |
| 10 to 14                           | 1.4   | -     | 0.8    | -     | -6.0  | 4.1   | -0.2 | 0.1   |
| <b>Deforestation/Degradation</b> * | 11.1  | -     | 1.4    | -     | -2.6  | -0.3  | -0.1 | -0.1  |
| 8 to 9                             | 18.9  | -     | 2.1    | -     | -6.4  | -2.6  | 0.0  | -0.3  |
| 9 to 7                             | -7.3  | -     | -3.1   | -     | 2.2   | 3.0   | -0.1 | 0.3   |
| 9 to 10                            | 8.6   | -     | 2.8    | -     | -2.0  | 2.1   | -0.4 | 0.2   |
| <b>Greening</b> *                  | -19.2 | -     | -3.3   | -     | 7.9   | -6.3  | 0.2  | -0.4  |
| 9 to 8                             | -18.7 | -     | -2.6   | -     | 4.9   | 1.4   | -0.1 | 0.1   |
| 10 to 9                            | -2.8  | -     | -6.8   | -     | 0.9   | -4.3  | 1.0  | -0.7  |
| 16 to 7                            | -37.5 | -     | -7.3   | -     | 26.9  | -11.6 | 1.0  | -0.8  |
| 16 to 10                           | -21.2 | -     | -3.8   | -     | 19.4  | -20.8 | 0.1  | -1.4  |

\*: Shows average difference for a broad class of LULCC followed by the average difference in the major MODIS LULC transitions that comprise that class. MODIS Land Use Categories: 2 – Evergreen Broad Leaf Forest; 7 – Open Shrublands; 8 – Woody Savanna; 9 – Savannas; 10 – Grasslands; 12 – Croplands; 14 – Cropland/Natural Mosaic; 16 – Barren/ Sparsely Vegetated.

Table S19: Annual Average Surface Radiative Flux Change ( $\text{W m}^{-2}$ ) in WRF Grid Cells that experience LULCCs between 2001 and 2015 with Noah

| Transition                         | USRS  |       | SWDOWN |       | ULRS |       | GLW  |       |
|------------------------------------|-------|-------|--------|-------|------|-------|------|-------|
|                                    | Day   | Night | Day    | Night | Day  | Night | Day  | Night |
| <b>Agricultural Expansion</b> *    | -10.3 | -     | -2.2   | -     | 0.5  | -1.2  | 0.3  | 0.1   |
| 10 to 12                           | -3.5  | -     | -1.1   | -     | 1.4  | -0.2  | 0.1  | 0.1   |
| 2 to 14                            | 37.3  | -     | 11.9   | -     | -1.6 | -2.0  | -0.5 | -0.1  |
| 8 to 14                            | -32.2 | -     | -7.6   | -     | -1.1 | -1.9  | 0.7  | 0.3   |
| 10 to 14                           | -2.1  | -     | -1.1   | -     | 0.8  | -0.4  | 0.2  | 0.1   |
| <b>Deforestation/Degradation</b> * | -12.4 | -     | -2.3   | -     | -0.4 | -0.5  | 0.3  | 0.1   |
| 8 to 9                             | -35.0 | -     | -6.7   | -     | -1.6 | -0.9  | 0.8  | 0.1   |
| 9 to 7                             | 29.0  | -     | 5.2    | -     | 2.5  | 1.1   | -0.7 | 0.1   |
| 9 to 10                            | 4.0   | -     | 0.2    | -     | 1.1  | -0.2  | 0.0  | 0.1   |
| <b>Greening</b> *                  | -18.0 | -     | -2.6   | -     | 3.7  | 0.4   | 0.3  | -0.1  |
| 9 to 8                             | 34.8  | -     | 5.6    | -     | 2.5  | 0.9   | -0.4 | 0.2   |
| 10 to 9                            | -5.4  | -     | -1.7   | -     | -1.2 | 0.2   | 0.3  | 0.2   |
| 16 to 7                            | -59.2 | -     | -8.0   | -     | 7.6  | -0.2  | 0.9  | -0.5  |
| 16 to 10                           | -82.8 | -     | -12.7  | -     | 5.7  | -0.7  | 1.4  | -0.7  |

\*: Shows average difference for a broad class of LULCC followed by the average difference in the major MODIS LULC transitions that comprise that class. MODIS Land Use Categories: 2 – Evergreen Broad Leaf Forest; 7 – Open Shrublands; 8 – Woody Savanna; 9 – Savannas; 10 – Grasslands; 12 – Croplands; 14 – Cropland/Natural Mosaic; 16 – Barren/ Sparsely Vegetated.

Table S20: Annual Average Surface Heat Flux Change ( $\text{W m}^{-2}$ ) in WRF Grid Cells that experience LULCCs between 2001 and 2015 with CLM-AF

| Transition                        | HFX   |       | LH    |       | GRDFLX |       |
|-----------------------------------|-------|-------|-------|-------|--------|-------|
|                                   | Day   | Night | Day   | Night | Day    | Night |
| <b>Agricultural Expansion*</b>    | 0.6   | 1.2   | -9.0  | 1.1   | 4.0    | -3.8  |
| 10 to 12                          | 0.9   | 0.4   | -6.0  | 0.4   | 2.1    | -2.1  |
| 2 to 14                           | 0.4   | 9.7   | -61.0 | 8.7   | 31.1   | -30.1 |
| 8 to 14                           | -1.4  | 1.6   | -8.7  | 0.9   | 3.8    | -3.7  |
| 10 to 14                          | 10.0  | -1.0  | -4.3  | -0.4  | -1.3   | 1.1   |
| <b>Deforestation/Degradation*</b> | -6.7  | 2.2   | -8.3  | 0.7   | 5.3    | -5.1  |
| 8 to 9                            | -4.7  | 1.6   | -6.4  | 0.4   | 3.7    | -3.6  |
| 9 to 7                            | -14.7 | 2.6   | -10.1 | 0.8   | 7.5    | -7.1  |
| 9 to 10                           | -9.3  | 2.4   | -4.2  | 0.4   | 4.6    | -4.3  |
| <b>Greening*</b>                  | 8.4   | -3.8  | 13.3  | -1.4  | -9.0   | 8.7   |
| 9 to 8                            | 3.0   | -1.8  | 7.4   | -0.6  | -3.4   | 3.2   |
| 10 to 9                           | 13.8  | -4.3  | -0.1  | -1.3  | -9.8   | 8.8   |
| 16 to 7                           | 10.0  | -2.8  | 4.7   | -0.3  | -6.1   | 5.8   |
| 16 to 10                          | 27.3  | -3.9  | 10.3  | -0.5  | -11.9  | 11.8  |

\*: Shows average difference for a broad class of LULCC followed by the average difference in the major MODIS LULC transitions that comprise that class. MODIS Land Use Categories: 2 – Evergreen Broad Leaf Forest; 7 – Open Shrublands; 8 – Woody Savanna; 9 – Savannas; 10 – Grasslands; 12 – Croplands; 14 – Cropland/Natural Mosaic; 16 – Barren/ Sparsely Vegetated.

Table S21: Annual Average Surface Heat Flux Change ( $\text{W m}^{-2}$ ) in WRF Grid Cells that experience LULCCs between 2001 and 2015 with Noah-MP

| Transition                         | HFX   |       | LH    |       | GRDFLX |       |
|------------------------------------|-------|-------|-------|-------|--------|-------|
|                                    | Day   | Night | Day   | Night | Day    | Night |
| <b>Agricultural Expansion</b> *    | -20.1 | 1.9   | -3.3  | 0.0   | 3.0    | -2.9  |
| 10 to 12                           | -3.6  | 0.6   | 1.0   | -0.4  | 0.9    | -0.8  |
| 2 to 14                            | -4.2  | 6.6   | -38.6 | 1.9   | 14.0   | -13.8 |
| 8 to 14                            | -30.8 | 2.2   | 0.6   | -0.1  | 3.0    | -3.0  |
| 10 to 14                           | -2.1  | 0.2   | 1.8   | -0.2  | 0.4    | -0.4  |
| <b>Deforestation/Degradation</b> * | -7.6  | 0.9   | -2.3  | -0.1  | 0.8    | -0.8  |
| 8 to 9                             | -7.6  | 0.3   | -0.2  | 0.0   | 0.3    | -0.3  |
| 9 to 7                             | -2.2  | 1.9   | -3.6  | -0.1  | 1.1    | -1.1  |
| 9 to 10                            | -19.1 | -1.0  | -0.2  | 1.0   | 1.1    | -1.1  |
| <b>Greening</b> *                  | 1.5   | -1.3  | 9.4   | 0.0   | -2.0   | 2.0   |
| 9 to 8                             | 6.5   | -0.4  | 0.7   | 0.1   | -0.2   | 0.2   |
| 10 to 9                            | 24.6  | -1.8  | -0.7  | 0.0   | -2.2   | 1.9   |
| 16 to 7                            | 2.2   | -0.7  | 7.8   | 0.1   | -1.4   | 1.4   |
| 16 to 10                           | -2.9  | -1.3  | 10.2  | 0.3   | -3.1   | 2.9   |

\*: Shows average difference for a broad class of LULCC followed by the average difference in the major MODIS LULC transitions that comprise that class. MODIS Land Use Categories: 2 – Evergreen Broad Leaf Forest; 7 – Open Shrublands; 8 – Woody Savanna; 9 – Savannas; 10 – Grasslands; 12 – Croplands; 14 – Cropland/Natural Mosaic; 16 – Barren/ Sparsely Vegetated.

Table S22: Annual Average Surface Heat Flux Change ( $\text{W m}^{-2}$ ) in WRF Grid Cells that experience LULCCs between 2001 and 2015 with CLM-D

| Transition                        | HFX   |       | LH    |       | GRDFLX |       |
|-----------------------------------|-------|-------|-------|-------|--------|-------|
|                                   | Day   | Night | Day   | Night | Day    | Night |
| <b>Agricultural Expansion*</b>    | -8.8  | 1.9   | -8.1  | 0.2   | 3.9    | -3.8  |
| 10 to 12                          | 0.0   | 0.4   | -3.1  | -1.2  | 0.3    | -0.3  |
| 2 to 14                           | -3.2  | 12.3  | -63.0 | 6.2   | 31.9   | -30.7 |
| 8 to 14                           | -12.1 | 0.2   | -2.8  | -0.5  | -0.5   | 0.5   |
| 10 to 14                          | 0.8   | 0.1   | -0.5  | -0.8  | -0.3   | 0.3   |
| <b>Deforestation/Degradation*</b> | -4.5  | 0.3   | -2.9  | 0.0   | 0.3    | -0.4  |
| 8 to 9                            | -1.9  | -2.0  | -0.1  | -0.6  | -4.7   | 4.4   |
| 9 to 7                            | -6.0  | 1.9   | 0.5   | 0.2   | 3.3    | -3.3  |
| 9 to 10                           | -14.0 | 3.2   | -2.3  | 0.2   | 6.0    | -5.7  |
| <b>Greening*</b>                  | 7.8   | -3.2  | 16.6  | -0.7  | -7.6   | 7.4   |
| 9 to 8                            | -0.7  | 1.6   | 5.1   | 0.8   | 3.8    | -3.5  |
| 10 to 9                           | 16.8  | -5.0  | -1.1  | -1.0  | -11.5  | 10.4  |
| 16 to 7                           | 24.7  | -4.9  | 13.6  | 0.1   | -10.1  | 9.8   |
| 16 to 10                          | 13.3  | -4.0  | 17.5  | -0.8  | -13.7  | 13.5  |

\*: Shows average difference for a broad class of LULCC followed by the average difference in the major MODIS LULC transitions that comprise that class. MODIS Land Use Categories: 2 – Evergreen Broad Leaf Forest; 7 – Open Shrublands; 8 – Woody Savanna; 9 – Savannas; 10 – Grasslands; 12 – Croplands; 14 – Cropland/Natural Mosaic; 16 – Barren/ Sparsely Vegetated.

Table S23: Annual Average Surface Heat Flux Change ( $\text{W m}^{-2}$ ) in WRF Grid Cells that experience LULCCs between 2001 and 2015 with Noah

| Transition                        | HFX   |       | LH    |       | GRDFLX |       |
|-----------------------------------|-------|-------|-------|-------|--------|-------|
|                                   | Day   | Night | Day   | Night | Day    | Night |
| <b>Agricultural Expansion*</b>    | 5.4   | -0.7  | 5.5   | -1.0  | 3.1    | -3.0  |
| 10 to 12                          | -0.8  | 0.4   | 2.3   | -0.2  | 0.2    | -0.2  |
| 2 to 14                           | -0.4  | 1.2   | -21.2 | -2.0  | 2.8    | -2.7  |
| 8 to 14                           | 11.9  | -2.0  | 20.1  | -1.4  | 5.8    | -5.7  |
| 10 to 14                          | -2.3  | 0.5   | 3.0   | -0.2  | 0.3    | -0.3  |
| <b>Deforestation/Degradation*</b> | 9.3   | -1.1  | 3.7   | -0.5  | 2.2    | -2.2  |
| 8 to 9                            | 23.9  | -2.9  | 11.4  | -0.8  | 4.7    | -4.6  |
| 9 to 7                            | -23.2 | 2.8   | -7.8  | 0.2   | -4.0   | 3.9   |
| 9 to 10                           | -3.8  | -0.1  | -0.2  | -0.4  | 0.8    | -0.8  |
| <b>Greening*</b>                  | 12.2  | -1.0  | 0.0   | 0.2   | 0.2    | -0.3  |
| 9 to 8                            | -16.6 | 2.8   | -19.7 | 0.7   | -4.3   | 4.2   |
| 10 to 9                           | 6.2   | 0.1   | -1.7  | 0.4   | -0.7   | 0.6   |
| 16 to 7                           | 42.5  | -3.4  | 5.9   | -0.6  | 3.8    | -3.9  |
| 16 to 10                          | 57.6  | -7.8  | 16.6  | -0.4  | 8.2    | -8.3  |

\*: Shows average difference for a broad class of LULCC followed by the average difference in the major MODIS LULC transitions that comprise that class. MODIS Land Use Categories: 2 – Evergreen Broad Leaf Forest; 7 – Open Shrublands; 8 – Woody Savanna; 9 – Savannas; 10 – Grasslands; 12 – Croplands; 14 – Cropland/Natural Mosaic; 16 – Barren/ Sparsely Vegetated.

Table S24: Annual Average Near Surface Temperature Profile Change in WRF Grid Cells that experience LULCCs between 2001 and 2015 with CLM-AF

| Transition                        | TSK (°C) |       | T2 (°C) |       | TATM ( $10^{-1}$ °C) |       | TGSATM ( $10^{-2}$ °C m <sup>-1</sup> ) |       |
|-----------------------------------|----------|-------|---------|-------|----------------------|-------|-----------------------------------------|-------|
|                                   | Day      | Night | Day     | Night | Day                  | Night | Day                                     | Night |
| <b>Agricultural Expansion*</b>    | 0.7      | 0.1   | 0.0     | 0.3   | 0.1                  | 0.7   | 2.2                                     | 0.0   |
| 10 to 12                          | 0.7      | 0.0   | 0.1     | 0.2   | 0.2                  | 0.2   | 2.1                                     | -0.3  |
| 2 to 14                           | 3.1      | 1.8   | 0.4     | 2.3   | 1.8                  | 6.3   | 9.6                                     | 2.0   |
| 8 to 14                           | 0.5      | 0.2   | 0.0     | 0.3   | -0.1                 | 0.5   | 1.8                                     | 0.3   |
| 10 to 14                          | 0.8      | -0.3  | 0.1     | 0.0   | 0.7                  | -0.2  | 2.5                                     | -0.9  |
| <b>Deforestation/Degradation*</b> | 0.0      | 0.5   | 0.0     | 0.4   | -0.2                 | 1.4   | 0.2                                     | 0.8   |
| 8 to 9                            | 0.5      | 0.2   | 0.0     | 0.3   | -0.2                 | 0.8   | 1.9                                     | 0.1   |
| 9 to 7                            | -1.9     | 1.9   | -0.1    | 0.8   | -0.2                 | 4.0   | -6.4                                    | 4.0   |
| 9 to 10                           | -0.4     | 0.3   | -0.1    | 0.3   | -0.7                 | 0.7   | -1.1                                    | 0.5   |
| <b>Greening*</b>                  | 1.1      | -1.4  | -0.1    | -0.7  | -1.3                 | -2.5  | 4.6                                     | -3.1  |
| 9 to 8                            | -0.4     | -0.2  | 0.0     | -0.2  | 0.2                  | -0.4  | -1.5                                    | -0.2  |
| 10 to 9                           | 0.5      | -0.6  | 0.1     | -0.6  | 0.7                  | -2.5  | 1.4                                     | -0.3  |
| 16 to 7                           | 4.0      | -2.0  | -0.3    | -0.5  | -3.7                 | -2.9  | 16.2                                    | -5.0  |
| 16 to 10                          | 4.8      | -4.8  | -0.1    | -1.4  | -2.8                 | -6.1  | 17.8                                    | -12.4 |

\*: Shows average difference for a broad class of LULCC followed by the average difference in the major MODIS LULC transitions that comprise that class. MODIS Land Use Categories: 2 – Evergreen Broad Leaf Forest; 7 – Open Shrublands; 8 – Woody Savanna; 9 – Savannas; 10 – Grasslands; 12 – Croplands; 14 – Cropland/Natural Mosaic; 16 – Barren/ Sparsely Vegetated.



Table S25: Annual Average Near Surface Temperature Profile Change in WRF Grid Cells that experience LULCCs between 2001 and 2015 with Noah-MP

| Transition                        | TSK (°C) |       | T2 (°C) |       | TATM (10 <sup>-1</sup> °C) |       | TGSATM (10 <sup>-2</sup> °C m <sup>-1</sup> ) |       |
|-----------------------------------|----------|-------|---------|-------|----------------------------|-------|-----------------------------------------------|-------|
|                                   | Day      | Night | Day     | Night | Day                        | Night | Day                                           | Night |
| <b>Agricultural Expansion*</b>    | 0.7      | 0.2   | 0.0     | 0.2   | -1.3                       | 0.9   | 3.3                                           | 0.1   |
| 10 to 12                          | 0.4      | 0.1   | 0.2     | 0.1   | 0.0                        | 0.7   | 1.4                                           | 0.1   |
| 2 to 14                           | 2.2      | 1.0   | 0.3     | 0.9   | 0.5                        | 4.1   | 7.4                                           | 0.8   |
| 8 to 14                           | 0.8      | 0.1   | -0.2    | 0.2   | -2.2                       | 0.5   | 3.9                                           | 0.1   |
| 10 to 14                          | 0.1      | 0.1   | 0.1     | 0.1   | -0.1                       | 0.2   | 0.5                                           | 0.1   |
| <b>Deforestation/Degradation*</b> | 0.3      | 0.0   | -0.1    | 0.0   | -0.6                       | -0.1  | 1.3                                           | 0.0   |
| 8 to 9                            | 0.0      | 0.0   | -0.1    | 0.0   | -0.6                       | -0.1  | 0.3                                           | 0.0   |
| 9 to 7                            | 0.9      | -0.1  | -0.2    | 0.1   | -0.5                       | -0.5  | 3.3                                           | -0.2  |
| 9 to 10                           | 0.3      | -0.1  | -0.1    | 0.0   | -1.2                       | -0.1  | 1.9                                           | -0.1  |
| <b>Greening*</b>                  | -0.6     | -0.2  | -0.1    | -0.2  | -0.1                       | -0.1  | -2.0                                          | -0.5  |
| 9 to 8                            | 0.0      | 0.0   | 0.0     | 0.0   | 0.3                        | -0.1  | -0.2                                          | 0.1   |
| 10 to 9                           | -0.5     | -0.1  | 0.2     | -0.2  | 0.1                        | -0.1  | -2.6                                          | 0.2   |
| 16 to 7                           | -0.6     | -0.1  | -0.1    | -0.1  | -0.1                       | 0.9   | -2.2                                          | -1.1  |
| 16 to 10                          | -0.8     | -0.3  | -0.1    | -0.3  | -0.4                       | 0.8   | -2.5                                          | -1.7  |

\*: Shows average difference for a broad class of LULCC followed by the average difference in the major MODIS LULC transitions that comprise that class. MODIS Land Use Categories: 2 – Evergreen Broad Leaf Forest; 7 – Open Shrublands; 8 – Woody Savanna; 9 – Savannas; 10 – Grasslands; 12 – Croplands; 14 – Cropland/Natural Mosaic; 16 – Barren/ Sparsely Vegetated.

Table S26: Annual Average Near Surface Temperature Profile Change in WRF Grid Cells that experience LULCCs between 2001 and 2015 with CLM-D

| Transition                        | TSK (°C) |       | T2 (°C) |       | TATM ( $10^{-1}$ °C) |       | TGSATM ( $10^{-2}$ °C m <sup>-1</sup> ) |       |
|-----------------------------------|----------|-------|---------|-------|----------------------|-------|-----------------------------------------|-------|
|                                   | Day      | Night | Day     | Night | Day                  | Night | Day                                     | Night |
| <b>Agricultural Expansion*</b>    | -2.0     | 0.8   | -0.1    | 0.3   | -0.5                 | 1.5   | -6.6                                    | 1.7   |
| 10 to 12                          | -2.4     | 1.8   | 0.1     | 0.2   | 1.6                  | 2.4   | -9.3                                    | 4.7   |
| 2 to 14                           | 1.3      | 1.9   | 0.4     | 2.3   | 1.2                  | 6.4   | 3.9                                     | 2.3   |
| 8 to 14                           | -2.7     | 0.3   | -0.2    | -0.1  | -1.3                 | 0.3   | -8.3                                    | 0.8   |
| 10 to 14                          | -1.3     | 0.9   | 0.0     | 0.1   | -0.1                 | 0.8   | -4.3                                    | 2.7   |
| <b>Deforestation/Degradation*</b> | -0.4     | -0.1  | 0.0     | 0.0   | -0.3                 | -0.2  | -1.0                                    | -0.1  |
| 8 to 9                            | -0.7     | -0.5  | 0.0     | -0.4  | -0.2                 | -1.3  | -2.3                                    | -0.7  |
| 9 to 7                            | 0.0      | 0.6   | -0.1    | 0.4   | -1.3                 | 0.9   | 0.8                                     | 1.5   |
| 9 to 10                           | -0.6     | 0.3   | -0.1    | 0.3   | -1.1                 | 0.9   | -1.5                                    | 0.6   |
| <b>Greening*</b>                  | 1.6      | -1.3  | 0.0     | -0.6  | -0.2                 | -2.6  | 5.4                                     | -2.7  |
| 9 to 8                            | 0.5      | 0.3   | 0.0     | 0.2   | -0.5                 | 0.1   | 2.1                                     | 0.7   |
| 10 to 9                           | 0.7      | -0.7  | 0.1     | -0.7  | 0.9                  | -2.9  | 1.7                                     | -0.5  |
| 16 to 7                           | 5.3      | -2.5  | 0.2     | -0.9  | 0.8                  | -0.4  | 17.4                                    | -6.1  |
| 16 to 10                          | 3.6      | -4.2  | 0.0     | -1.6  | -0.4                 | -5.6  | 12.3                                    | -10.8 |

\*: Shows average difference for a broad class of LULCC followed by the average difference in the major MODIS LULC transitions that comprise that class. MODIS Land Use Categories: 2 – Evergreen Broad Leaf Forest; 7 – Open Shrublands; 8 – Woody Savanna; 9 – Savannas; 10 – Grasslands; 12 – Croplands; 14 – Cropland/Natural Mosaic; 16 – Barren/ Sparsely Vegetated.

Table S27: Annual Average Near Surface Temperature Profile Change in WRF Grid Cells that experience LULCCs between 2001 and 2015 with Noah

| Transition                        | TSK (°C) |       | T2 (°C) |       | TATM ( $10^{-1}$ °C) |       | TGSATM ( $10^{-2}$ °C m <sup>-1</sup> ) |       |
|-----------------------------------|----------|-------|---------|-------|----------------------|-------|-----------------------------------------|-------|
|                                   | Day      | Night | Day     | Night | Day                  | Night | Day                                     | Night |
| <b>Agricultural Expansion*</b>    | -0.2     | -0.4  | 0.1     | -0.3  | 0.1                  | -1.1  | -0.7                                    | -0.5  |
| 10 to 12                          | 0.1      | -0.1  | -0.1    | -0.1  | -0.1                 | -0.1  | 0.3                                     | -0.4  |
| 2 to 14                           | -0.3     | -0.4  | -0.3    | -0.3  | -0.2                 | -0.7  | -0.7                                    | -0.8  |
| 8 to 14                           | -0.5     | -0.5  | 0.3     | -0.5  | 0.3                  | -2.0  | -1.9                                    | -0.4  |
| 10 to 14                          | 0.0      | -0.2  | -0.1    | -0.1  | -0.2                 | -0.1  | 0.1                                     | -0.5  |
| <b>Deforestation/Degradation*</b> | -0.1     | -0.1  | 0.2     | -0.1  | 0.5                  | -0.3  | -0.6                                    | -0.1  |
| 8 to 9                            | -0.1     | -0.1  | 0.5     | -0.1  | 1.2                  | -0.8  | -1.2                                    | 0.3   |
| 9 to 7                            | 0.1      | 0.0   | -0.5    | 0.1   | -0.8                 | 1.2   | 0.9                                     | -0.7  |
| 9 to 10                           | -0.1     | -0.2  | -0.1    | -0.1  | -0.3                 | -0.3  | -0.2                                    | -0.4  |
| <b>Greening*</b>                  | 0.3      | -0.1  | 0.2     | -0.1  | 0.9                  | -0.5  | 0.4                                     | -0.1  |
| 9 to 8                            | 0.3      | 0.1   | -0.3    | 0.1   | -0.6                 | 0.6   | 1.4                                     | -0.2  |
| 10 to 9                           | 0.2      | 0.3   | 0.1     | 0.2   | 0.4                  | 0.9   | 0.4                                     | 0.3   |
| 16 to 7                           | 0.5      | -0.5  | 0.5     | -0.5  | 2.6                  | -1.7  | 0.0                                     | -0.7  |
| 16 to 10                          | 0.2      | -0.5  | 0.8     | -0.6  | 3.1                  | -3.1  | -1.3                                    | 0.2   |

\*: Shows average difference for a broad class of LULCC followed by the average difference in the major MODIS LULC transitions that comprise that class. MODIS Land Use Categories: 2 – Evergreen Broad Leaf Forest; 7 – Open Shrublands; 8 – Woody Savanna; 9 – Savannas; 10 – Grasslands; 12 – Croplands; 14 – Cropland/Natural Mosaic; 16 – Barren/ Sparsely Vegetated.

## WRF Default MODIS Land Use

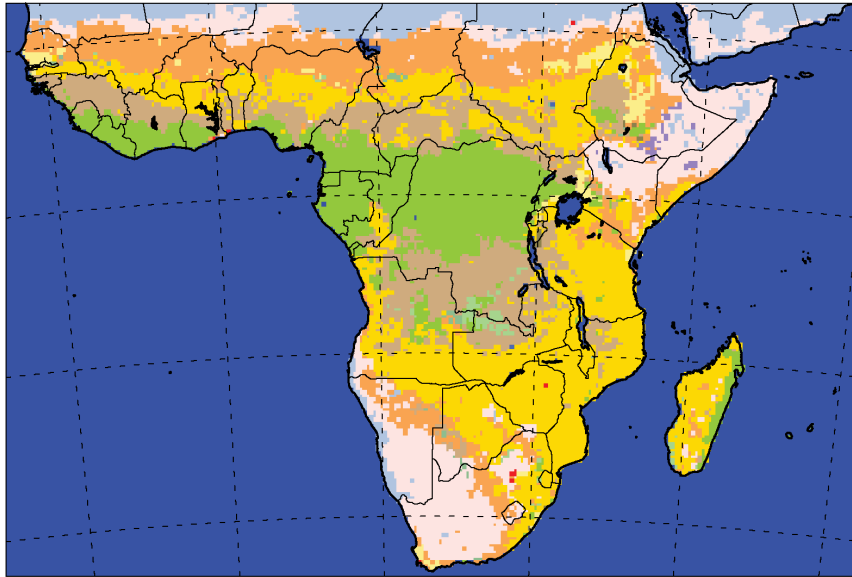

## LU01 MODIS Land Use

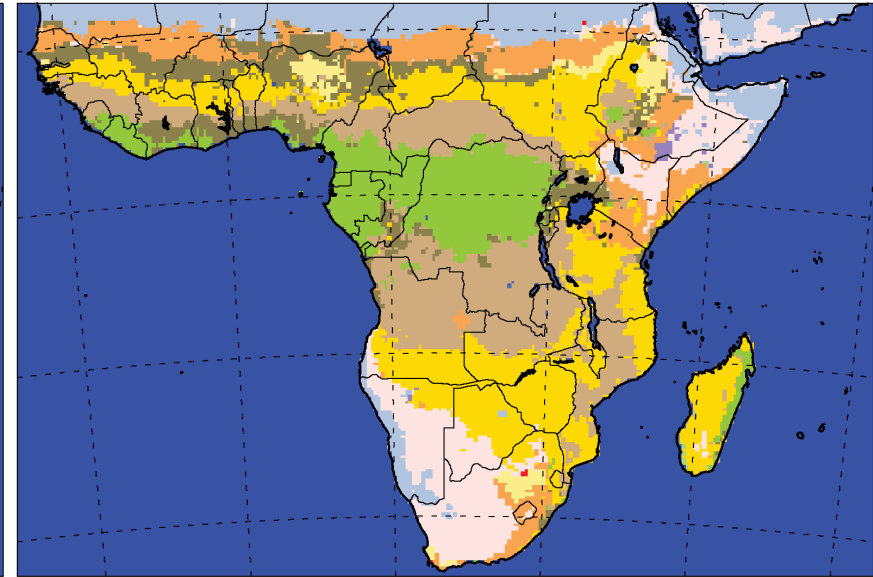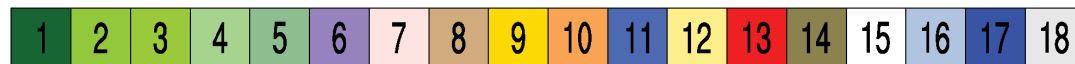

- |                        |                       |                   |                       |                       |                        |
|------------------------|-----------------------|-------------------|-----------------------|-----------------------|------------------------|
| 1 Evergreen Needleleaf | 4 Deciduous Broadleaf | 7 Open Shrublands | 10 Grasslands         | 13 Urban and Built-up | 16 Bare Soil and Rocks |
| 2 Evergreen Broadleaf  | 5 Mixed Forest        | 8 Woody Savannas  | 11 Permanent Wetlands | 14 Cropland Moasi     | 17 Water Bodies        |
| 3 Deciduous Needleleaf | 6 Closed Shrublands   | 9 Savannas        | 12 Croplands          | 15 Snow and Ice       | 18 Tundra              |

Fig S1. Comparison of the default WRF LULC dataset used in the meteorological evaluation simulations and the 2001 MODIS LULC dataset used in the LU01 simulations

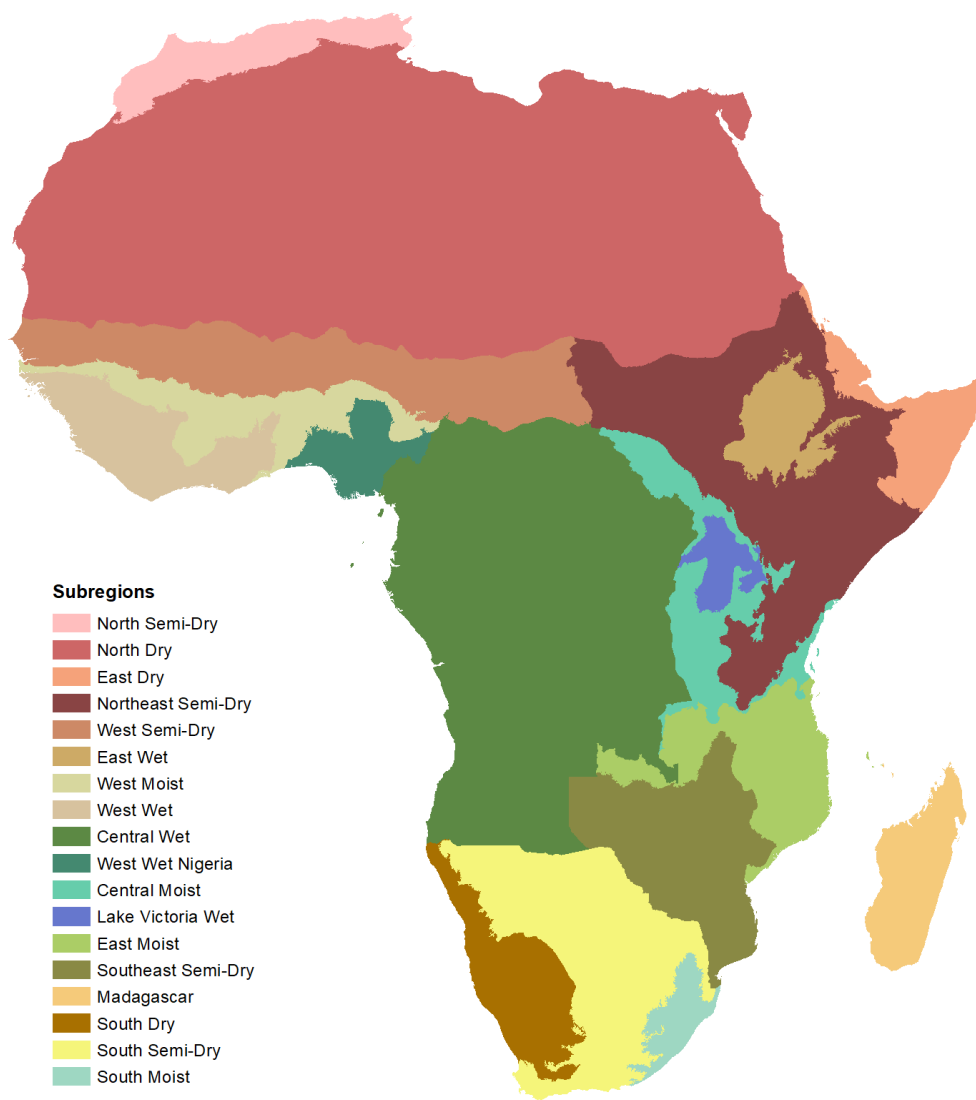

Fig S2. Regions used to model LULCC in Africa

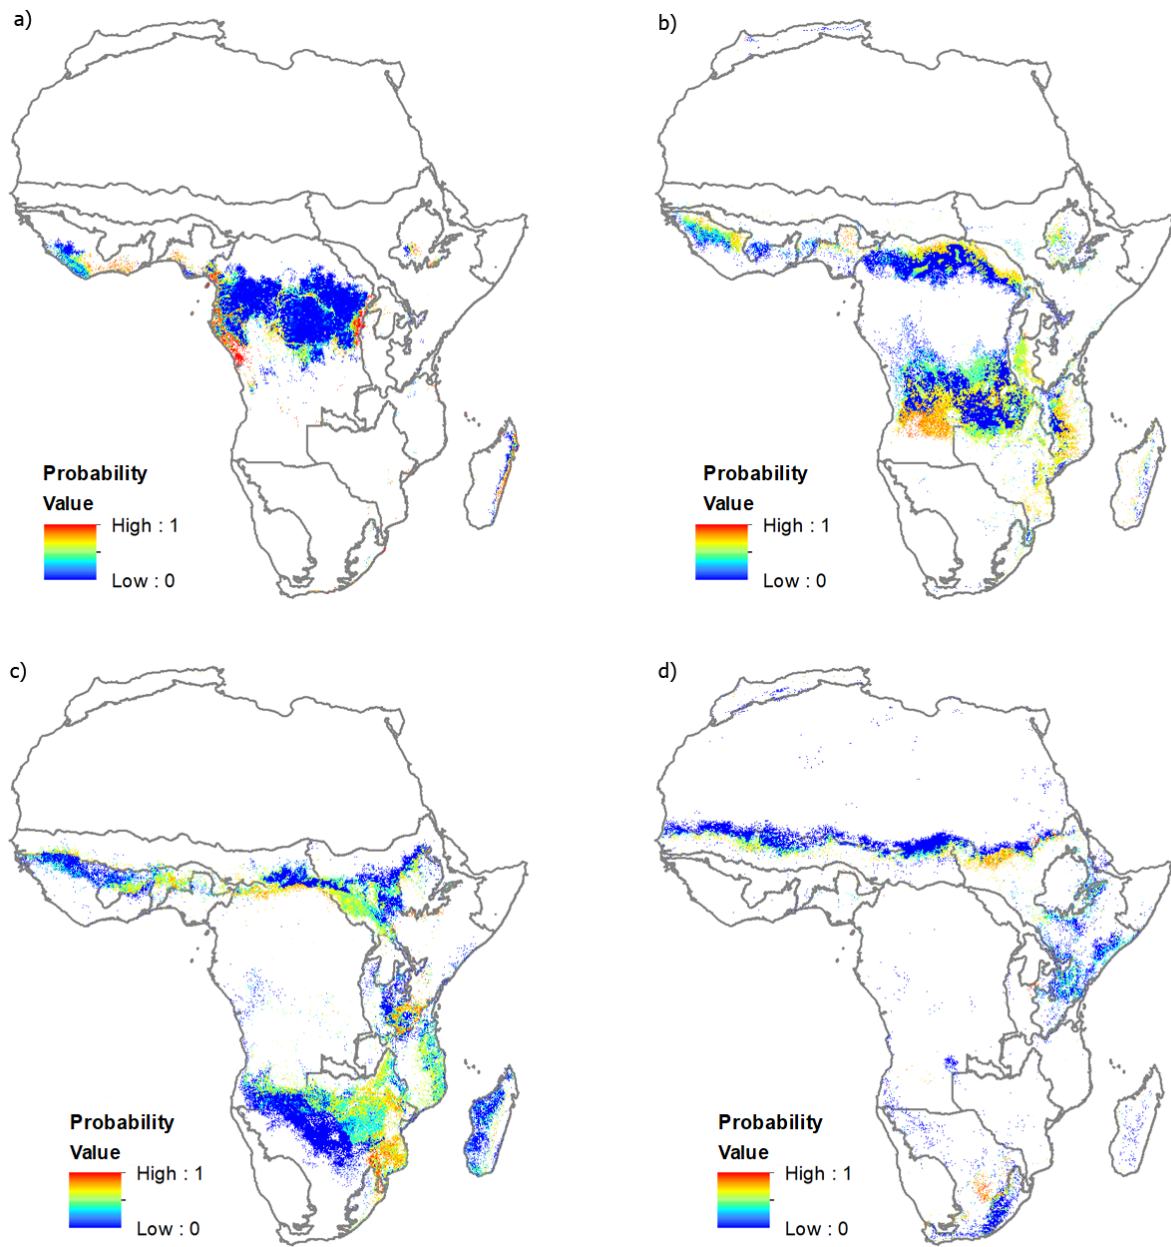

Fig S3. Probability maps for transitions a) Evergreen broadleaf forest to Cropland/Natural vegetation mosaic, b) Woody savannas to savannas, c) Savannas to woody savannas, and d) Grasslands to croplands.

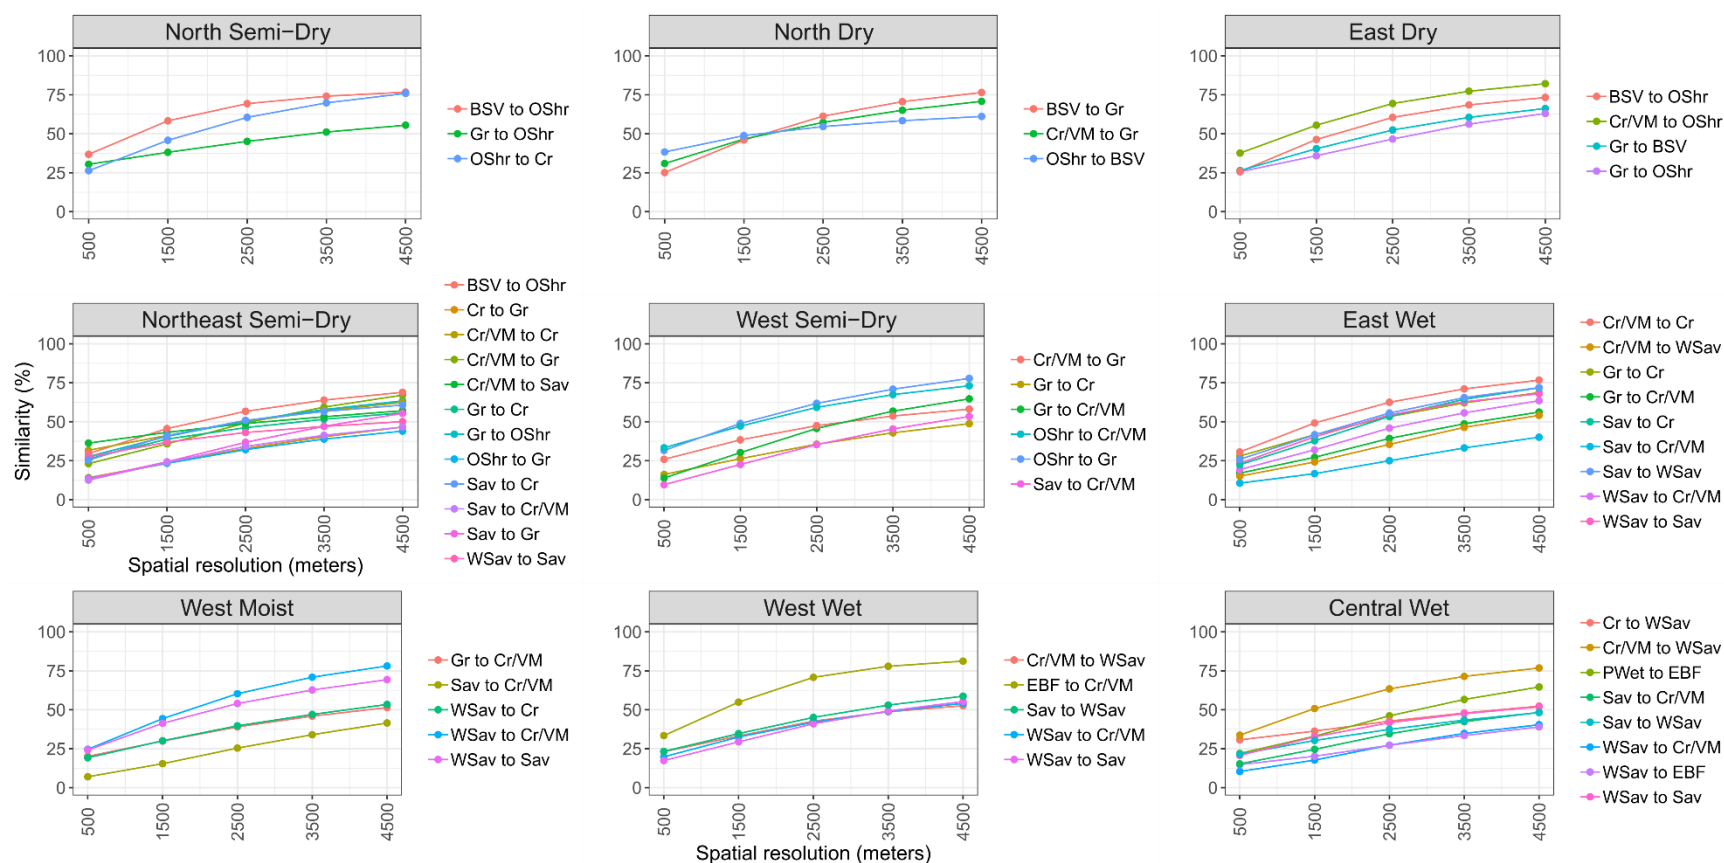

Fig S4 Part 1. Fuzzy similarity index between real and simulated changes for each transition by region.

Acronyms: EBF = Evergreen Broadleaf forest, MF = Mixed forest, CShr = Closed shrublands, OShr = Open shrublands, WSav = Woody savannas, Sav = Savannas, Gr = Grasslands, PWet = Permanent wetlands, Cr = Croplands, Cr/VM = Cropland/Natural vegetation mosaic, BSV = Barren or sparsely vegetated.

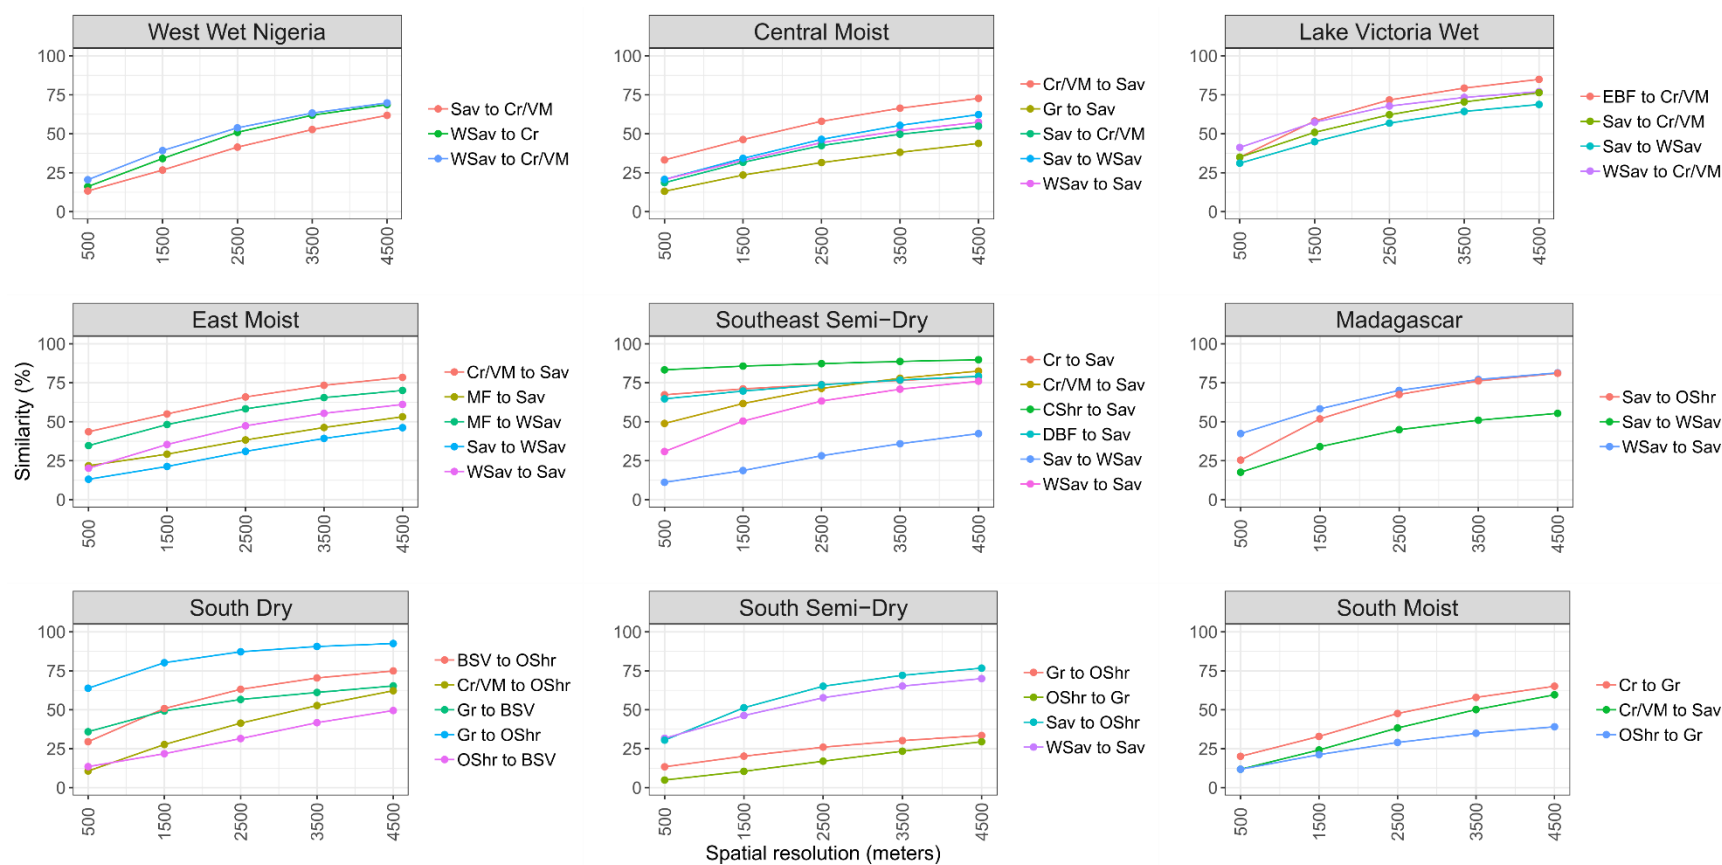

Fig S4 Part 2. Fuzzy similarity index between real and simulated changes for each transition by region.

Acronyms: EBF = Evergreen Broadleaf forest, MF = Mixed forest, CShr = Closed shrublands, OShr = Open shrublands, WSav = Woody savannas, Sav = Savannas, Gr = Grasslands, PWet = Permanent wetlands, Cr = Croplands, Cr/VM = Cropland/Natural vegetation mosaic, BSV = Barren or sparsely vegetated.



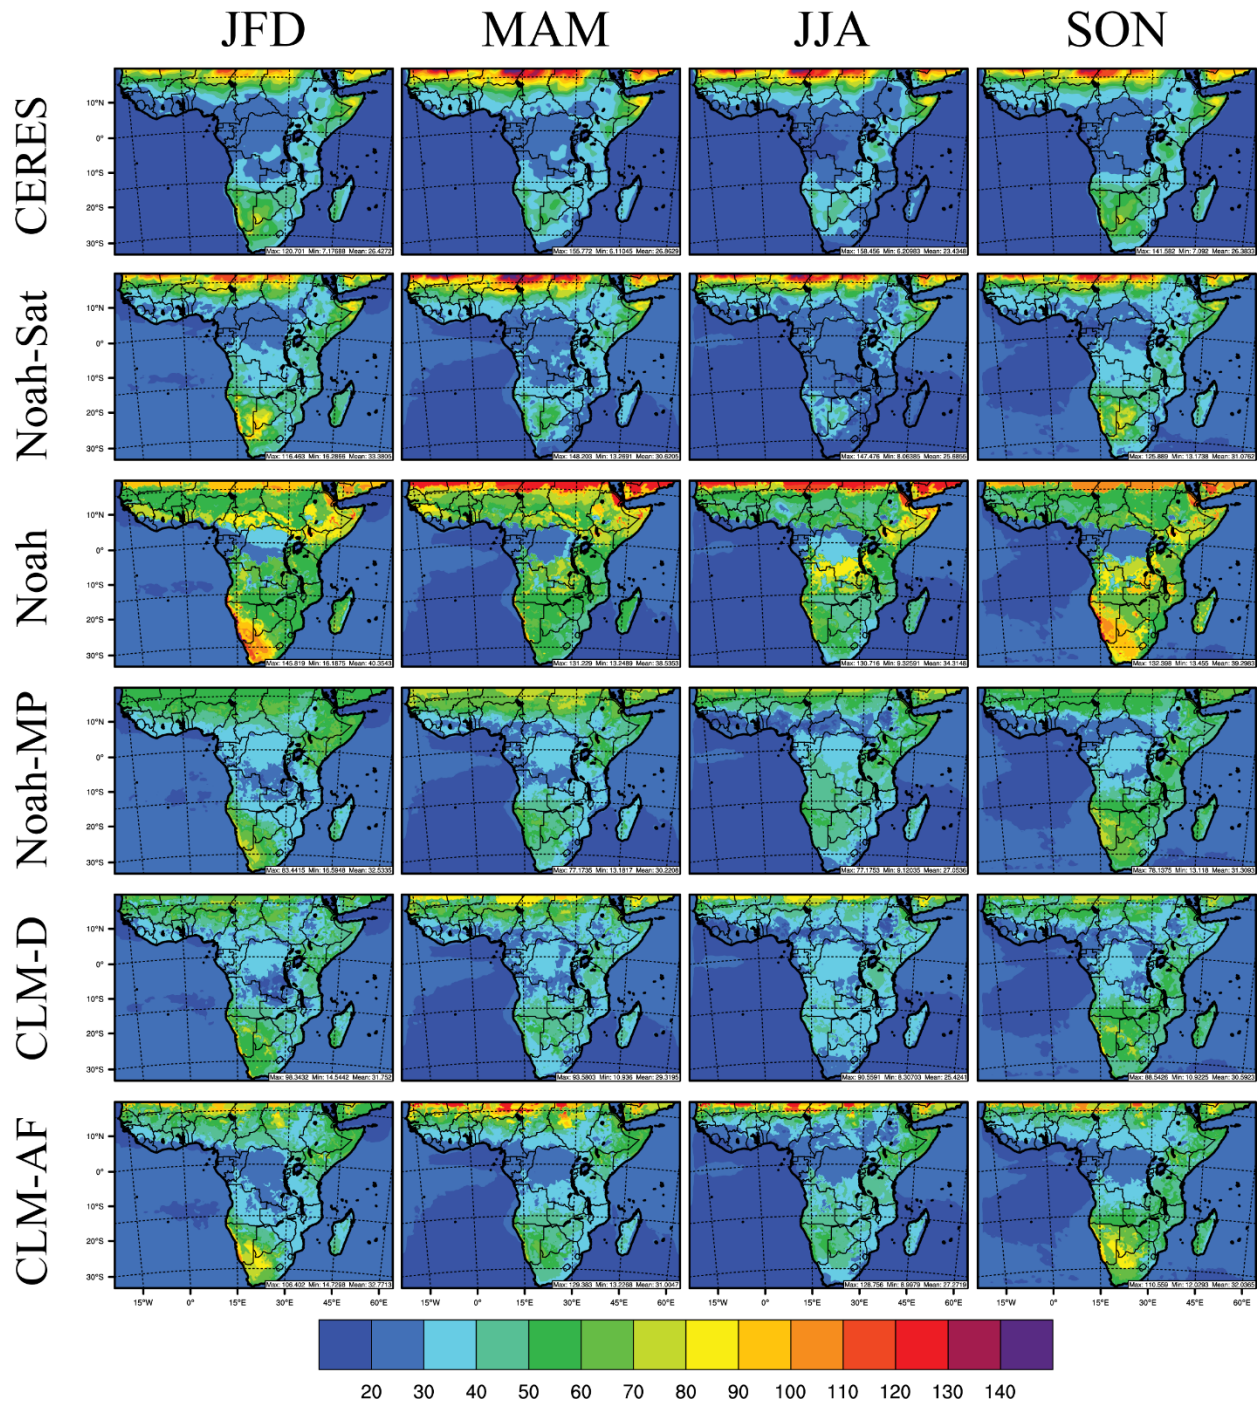

Fig S5: 2013 seasonal average upwelling shortwave radiation at the Earth's surface ( $\text{W m}^{-2}$ ) for CERES-EBAF estimates and WRF

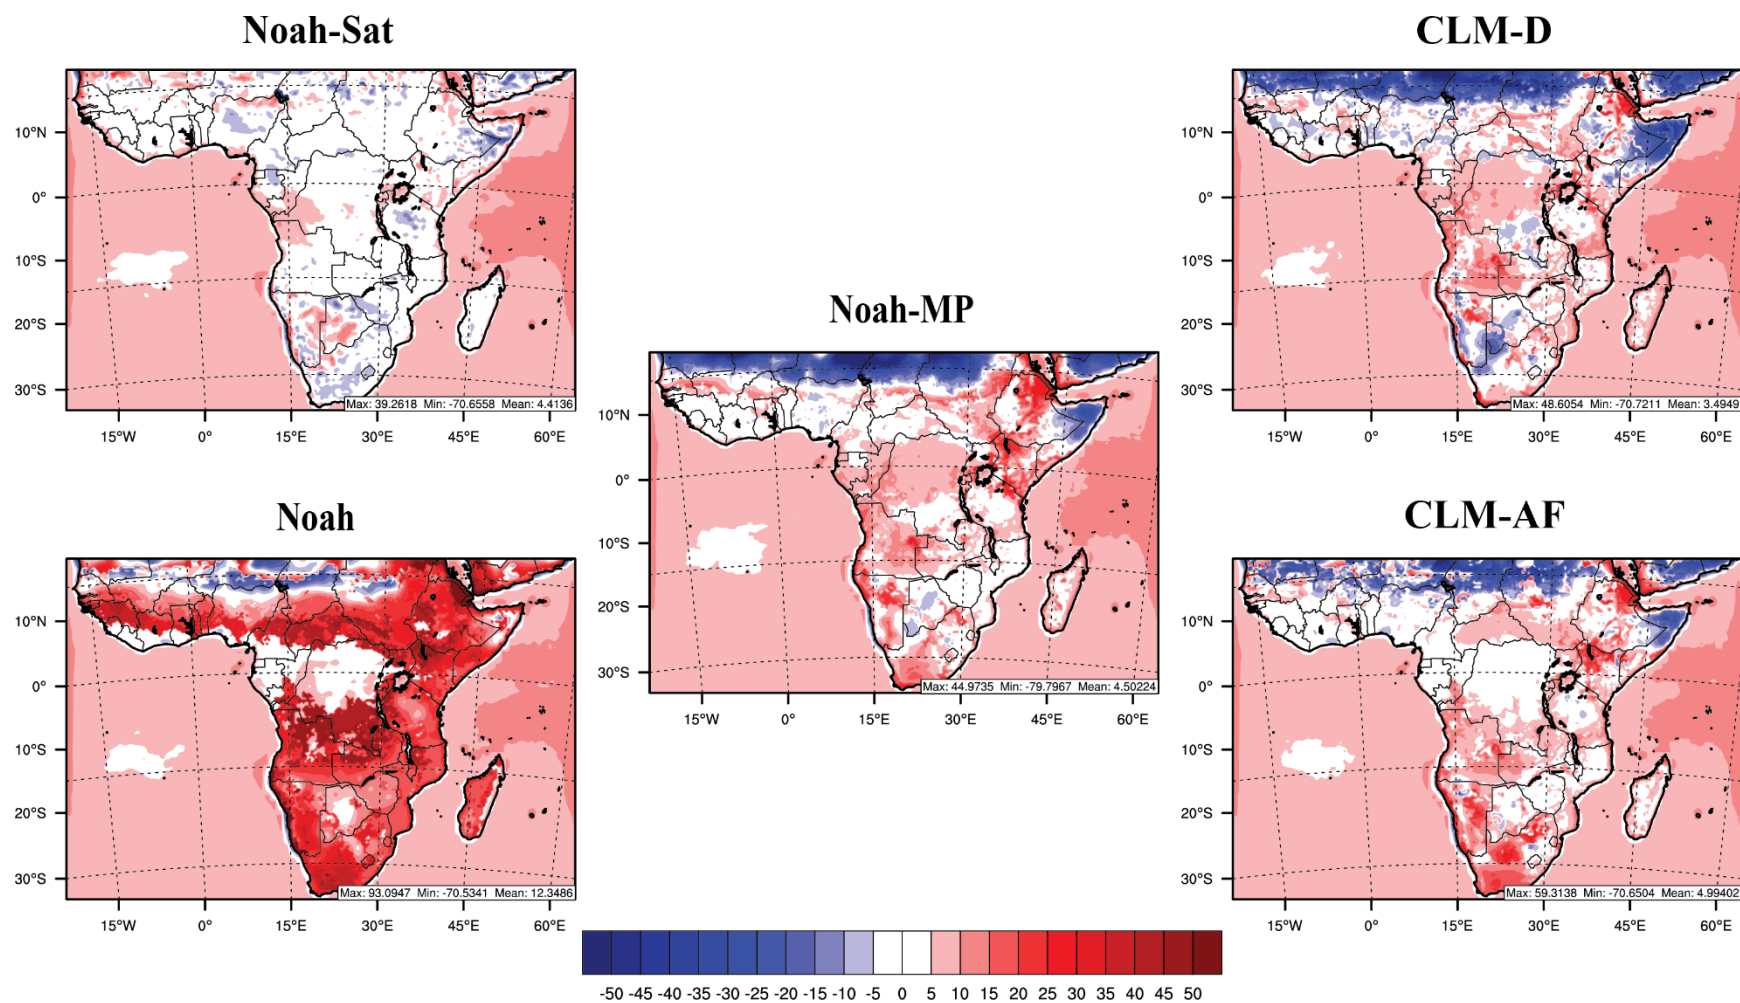

Fig S6: 2013 annual average differences in upwelling shortwave radiation at the Earth's surface ( $\text{W m}^{-2}$ ) between the WRF simulations and CERES-EBAF estimates (WRF - CERES-EBAF)

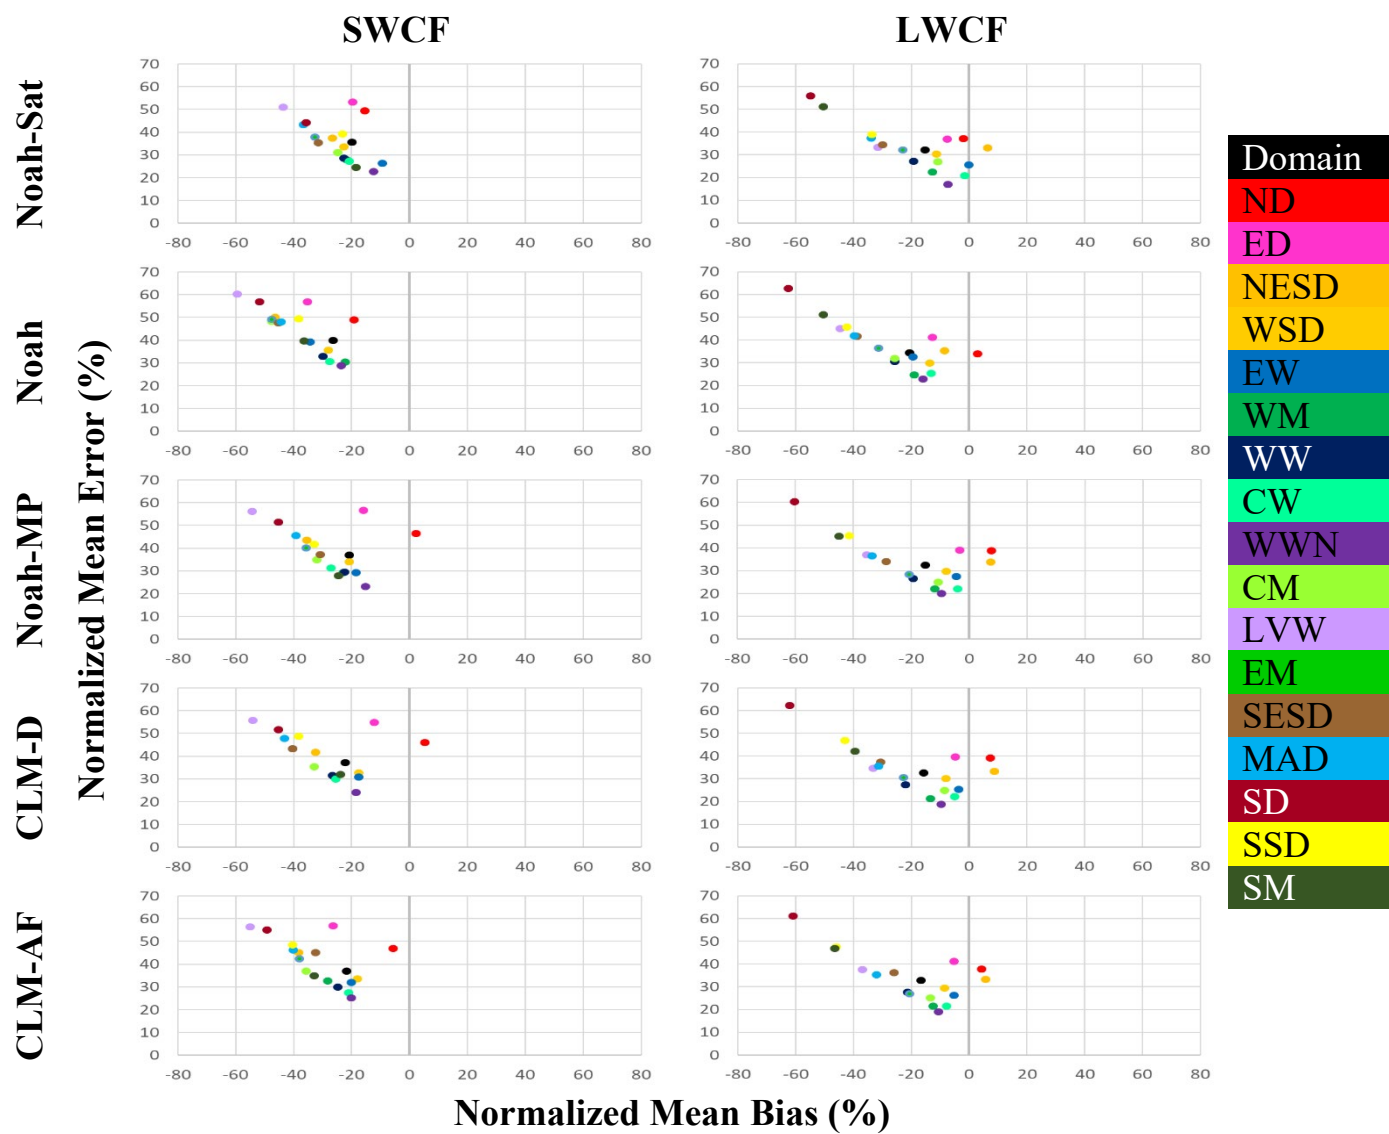

Fig S7 Soccer plot of domain and regional WRF SWCF and LWCF model performance statistics versus CERES-EBAF estimates

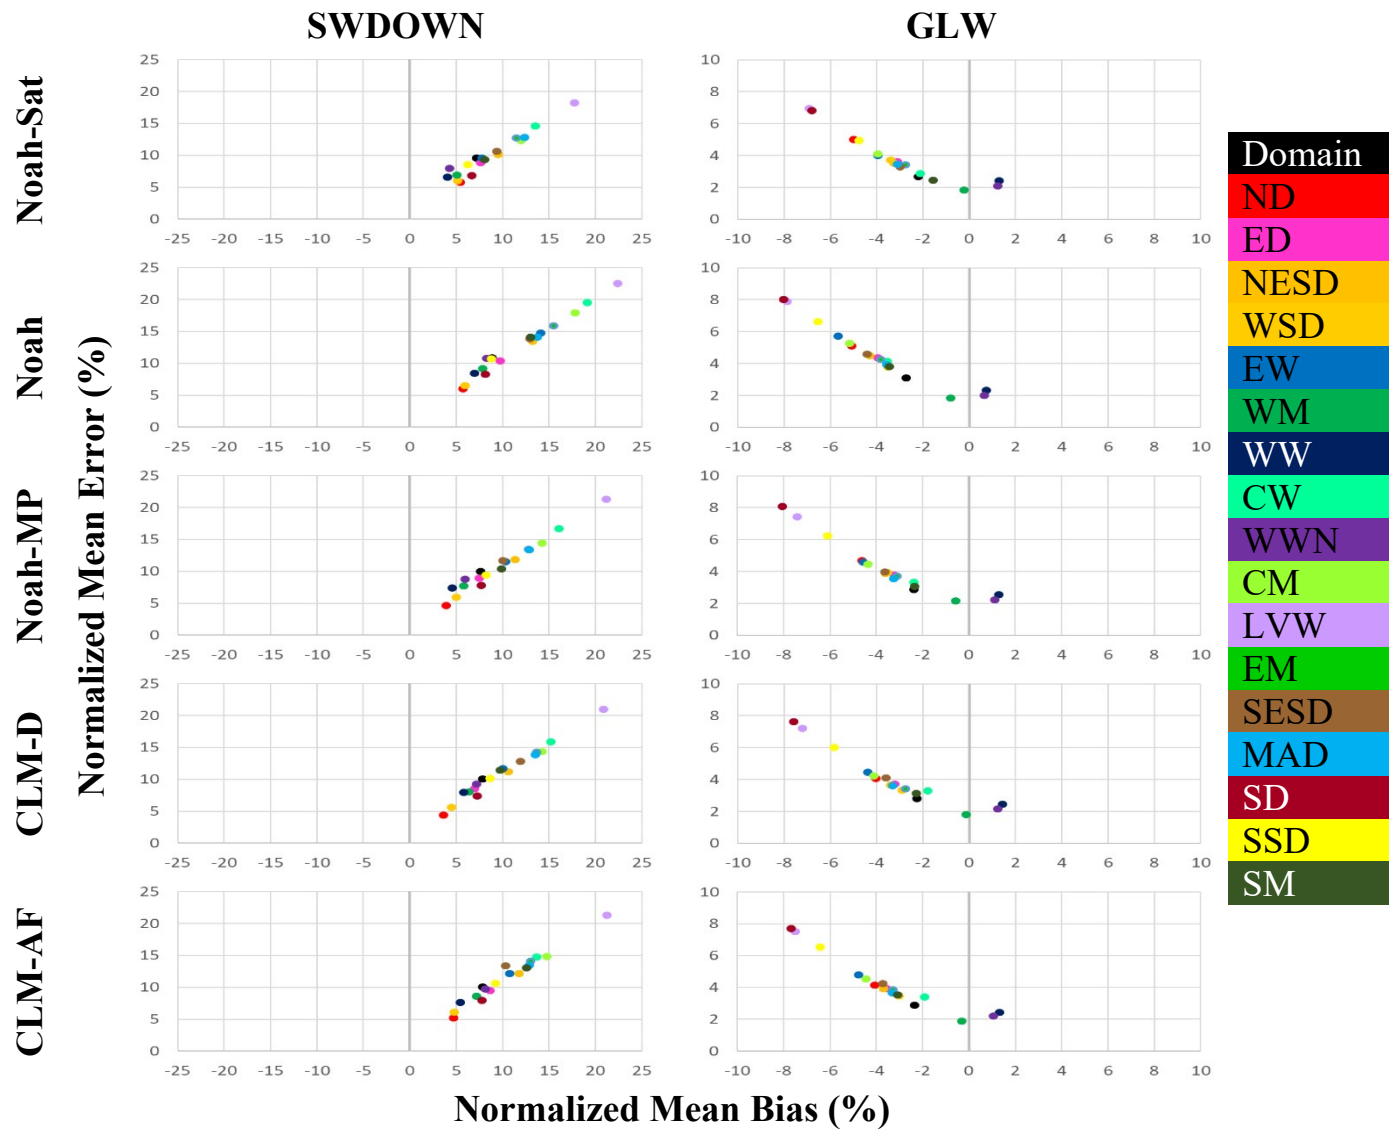

Fig S8: Soccer plot of domain and regional WRF SWDOWN and GLW model performance statistics versus CERES-EBAF estimates

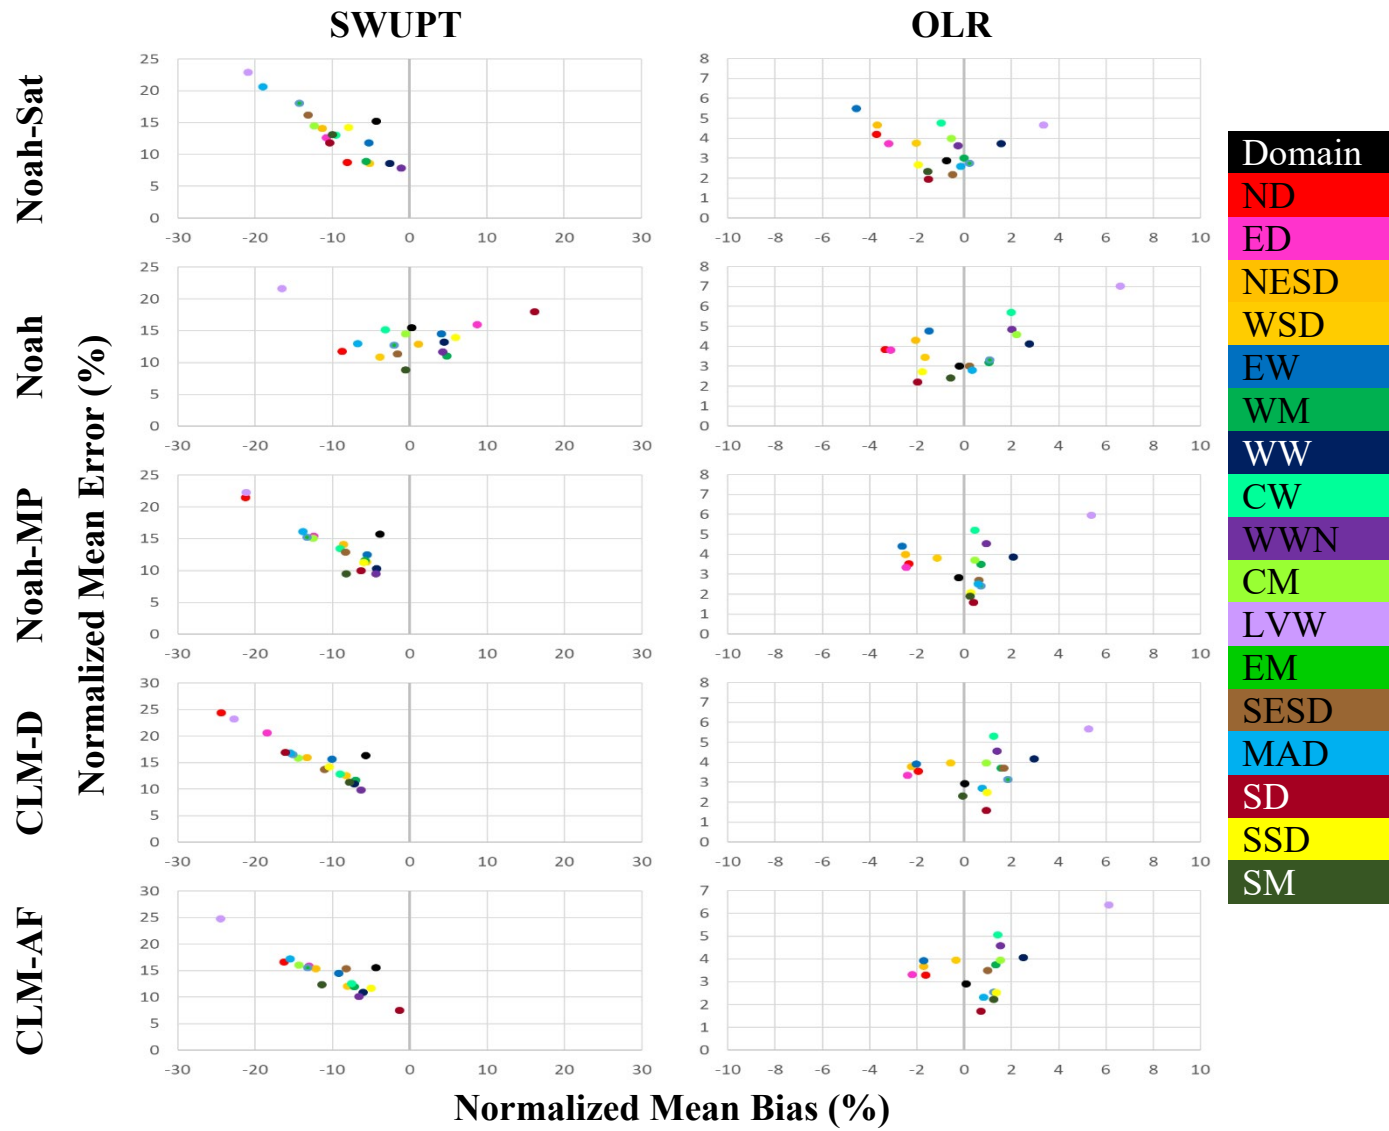

Fig S9: Soccer plot of domain and regional WRF SWUPT and OLR model performance statistics versus CERES-EBAF estimate



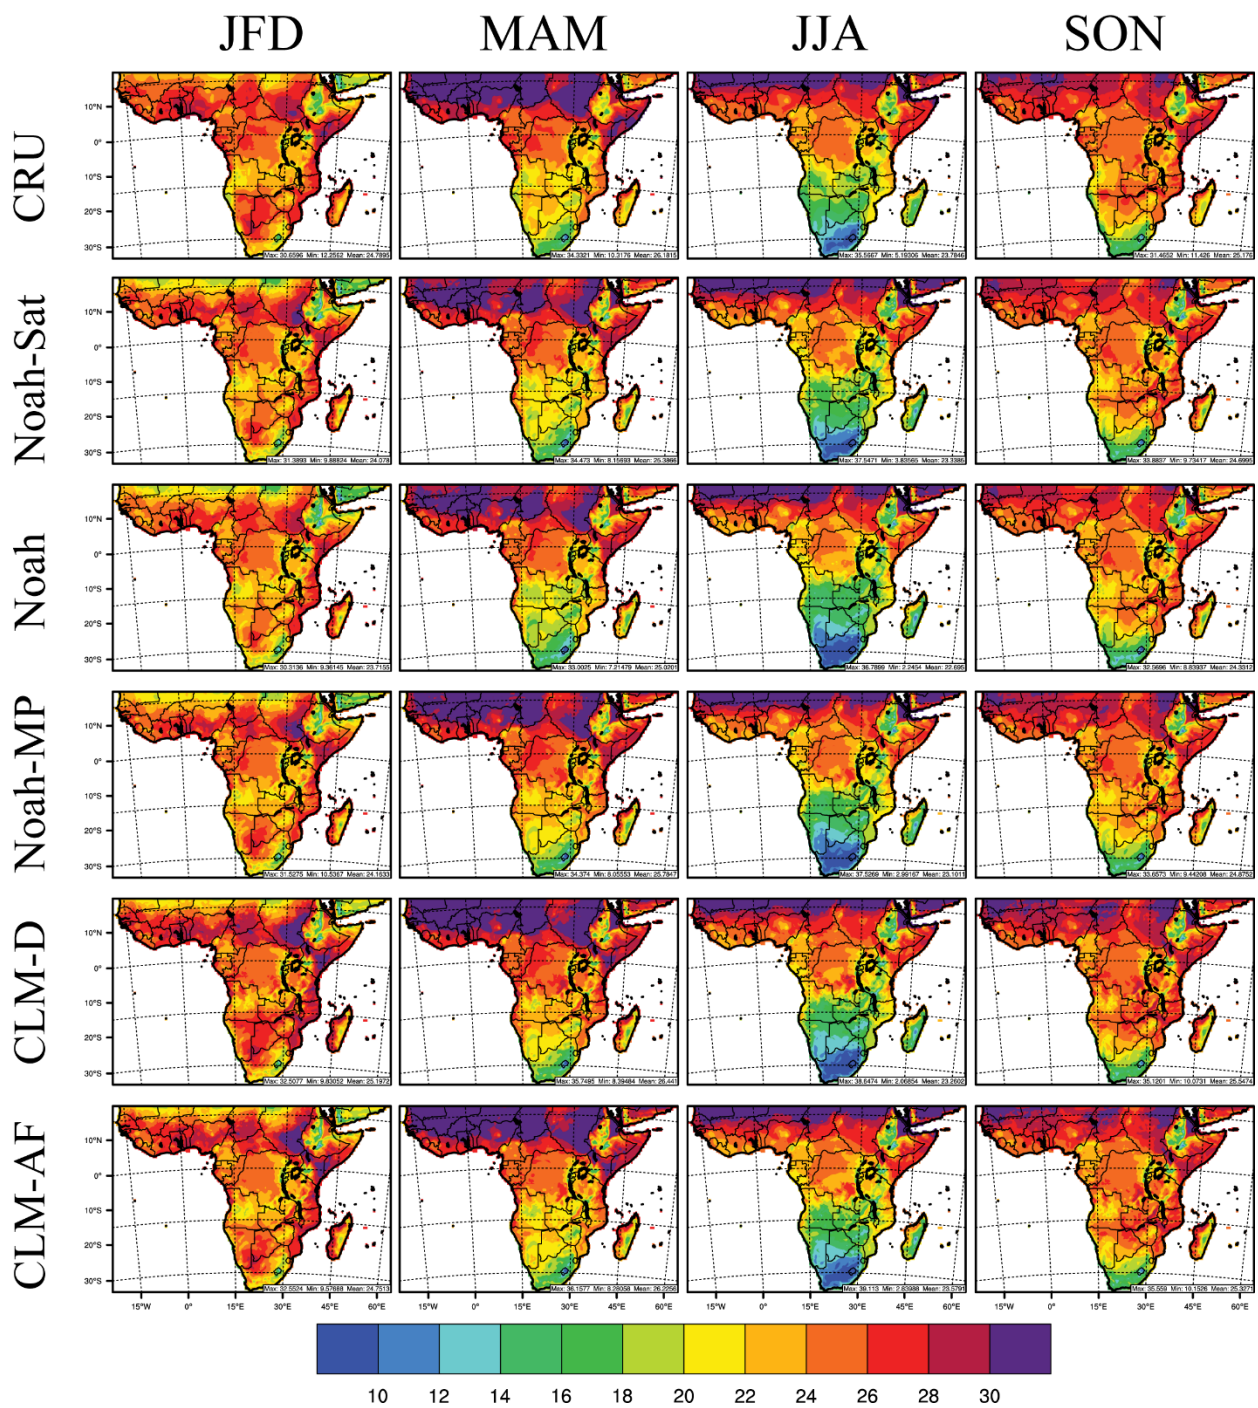

Fig S10: 2013 seasonal average 2-m temperature (°C) for CRU estimates and WRF

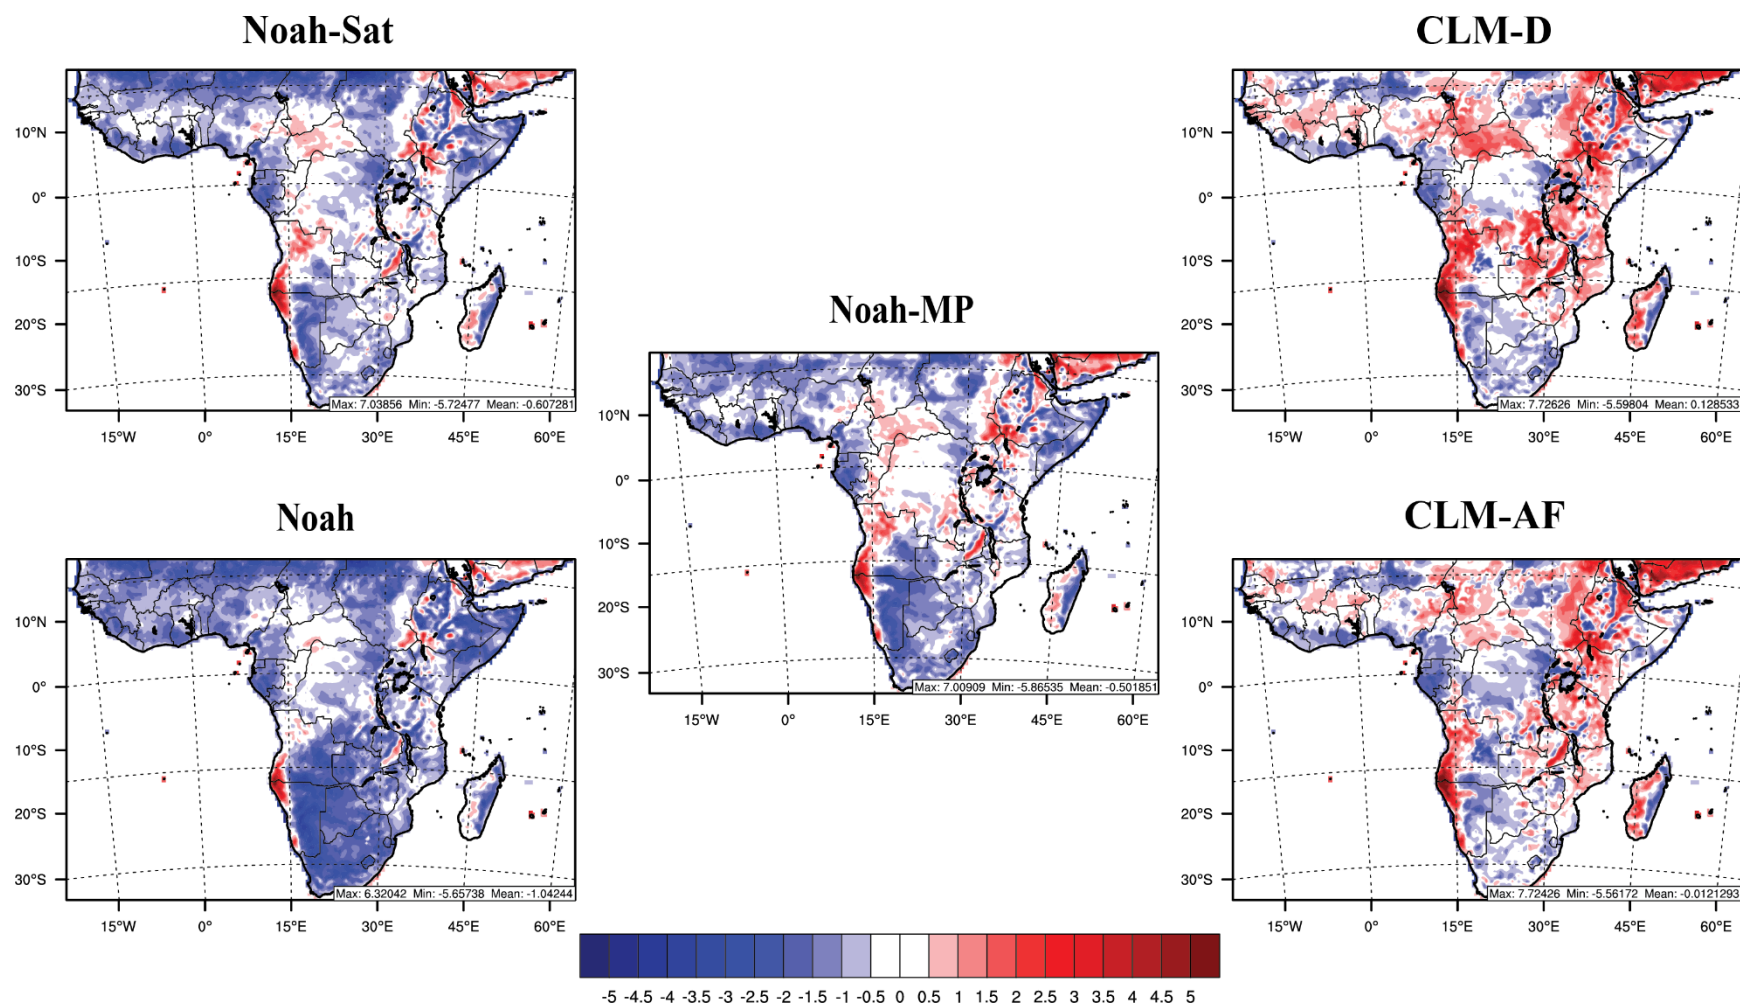

Fig S11: 2013 annual average differences in 2-m temperature (°C) between the WRF simulations and CRU estimates (WRF - CRU)

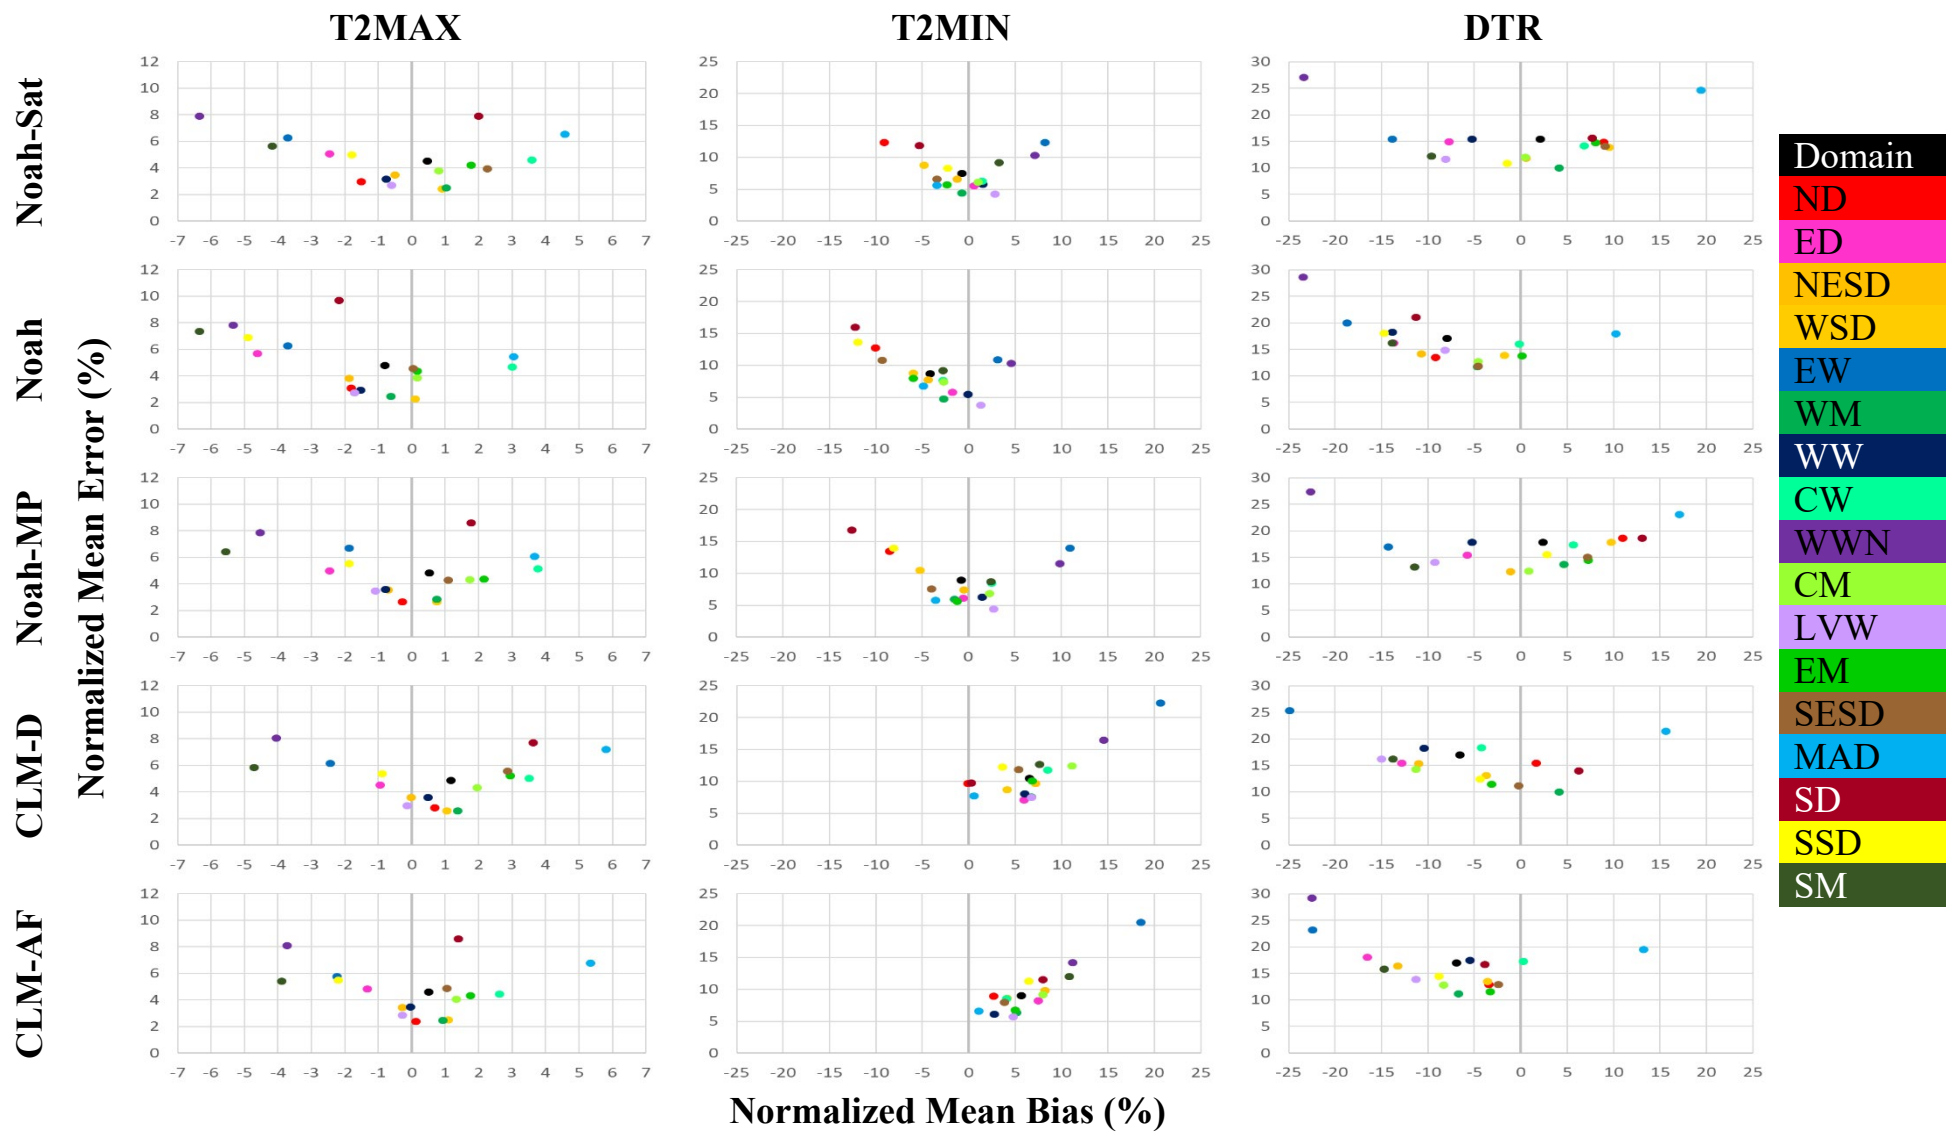

Fig S12. Soccer plots of domain and regional WRF annual average daily maximum 2-m temperature, daily minimum 2-m temperature, and diurnal temperature range compared to CRU estimates from the five WRF LSM configuration



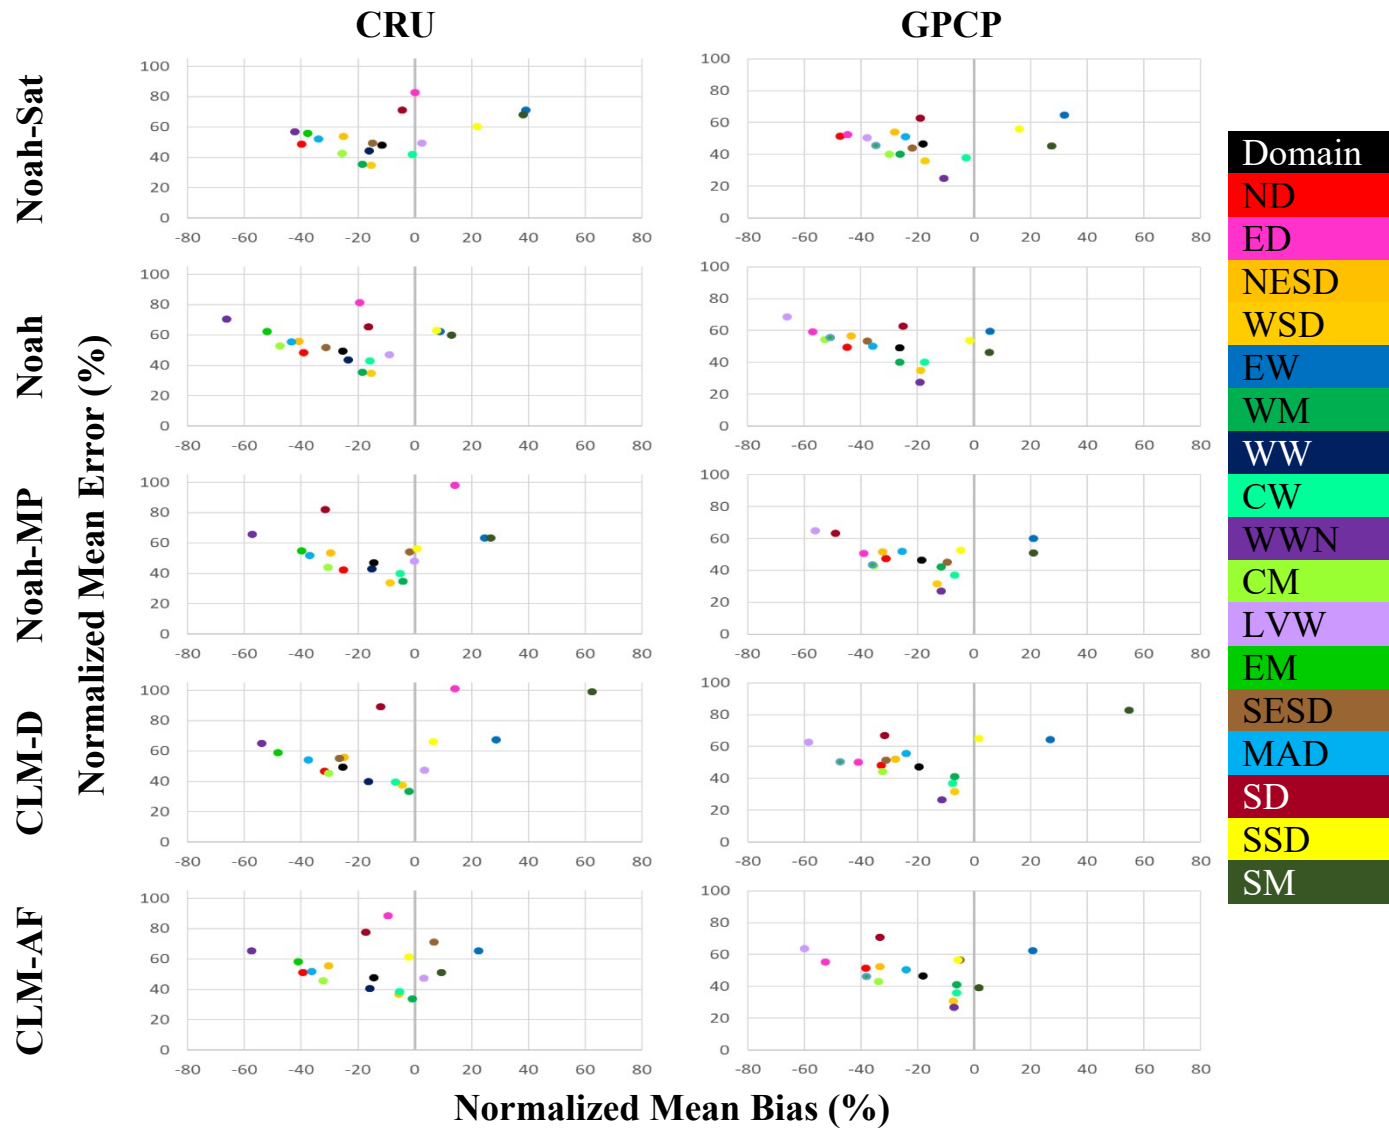

Fig S13: Soccer plot of domain and regional WRF precipitation model performance statistics versus CRU and GPCP estimates

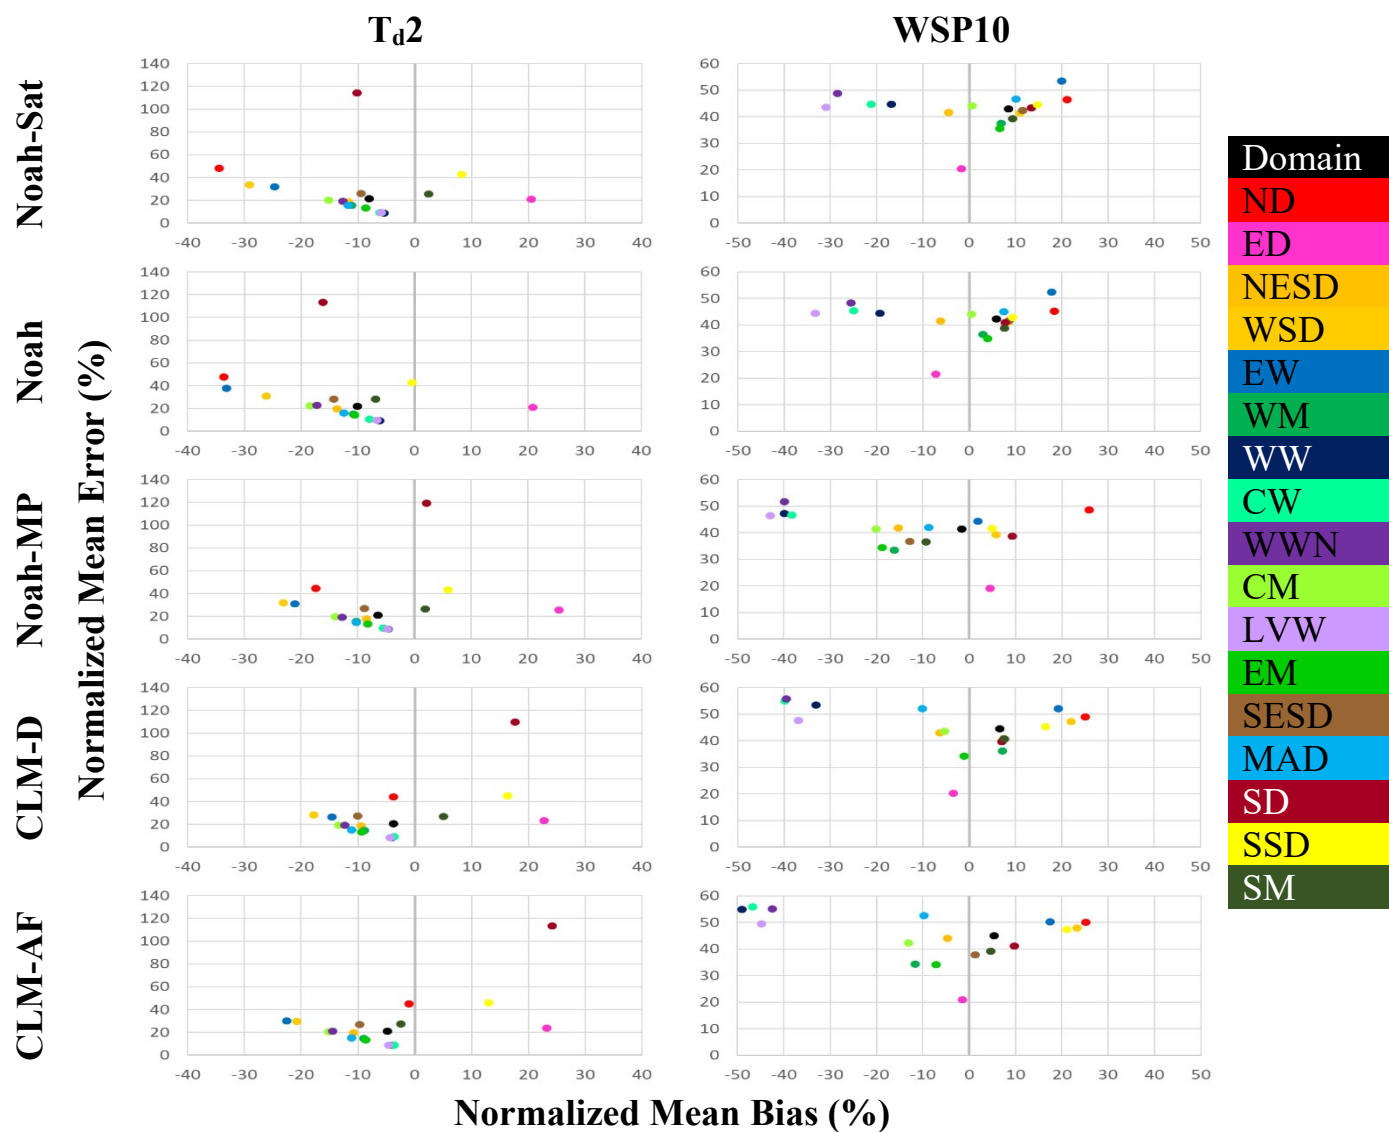

Fig S14: Soccer plot of domain and regional model performance statistics of WRF 2-m dew point temperature and 10-m wind speed versus NCEI-ISD observations

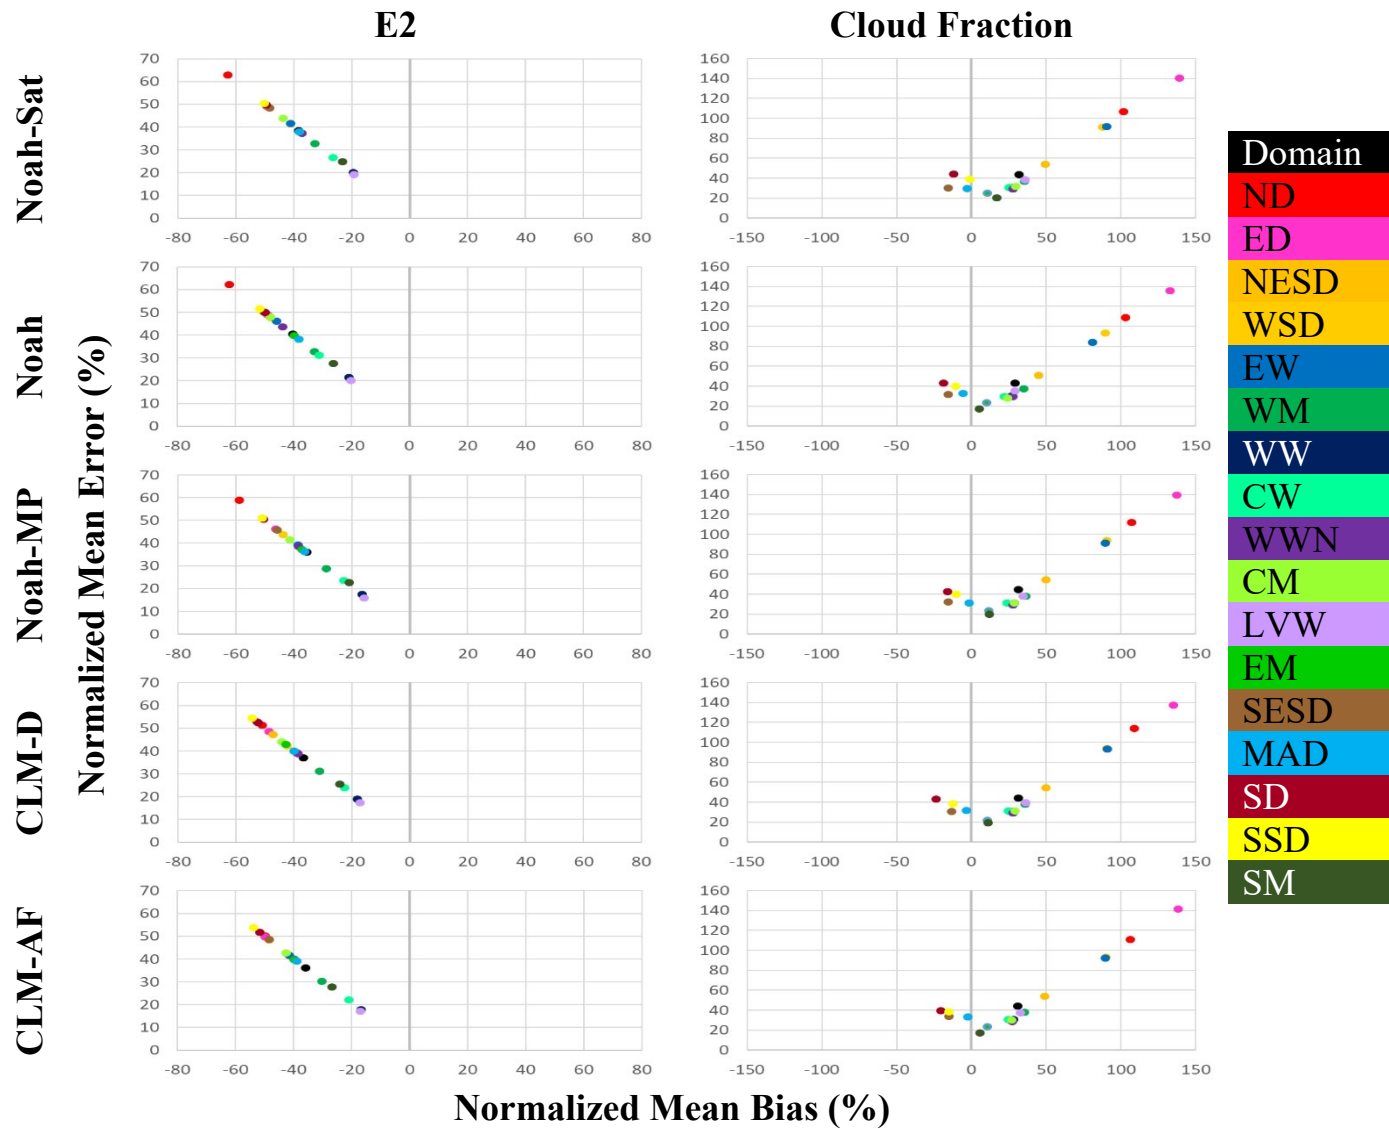

Fig S15: Soccer plot of domain and regional model performance statistics of WRF 2-m vapor pressure and cloud fraction speed versus CRU estimates

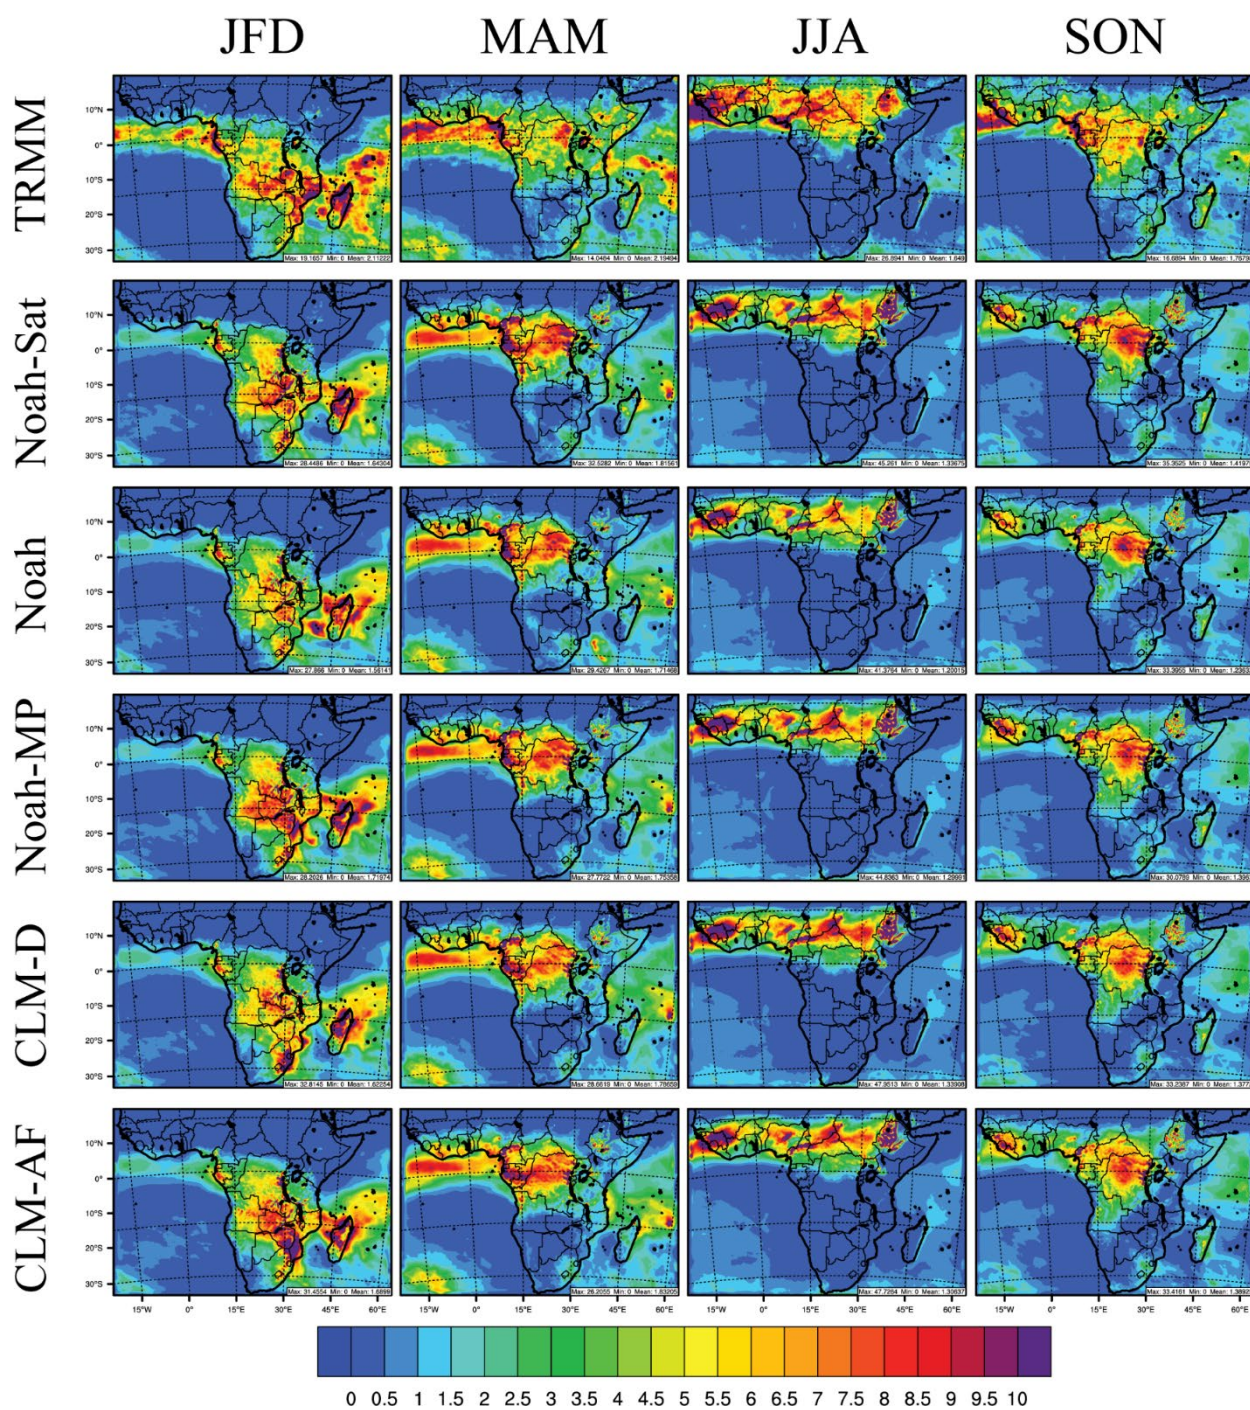

Fig S16: 2013 seasonal average precipitation (mm day<sup>-1</sup>) for TRMM estimates and WRF



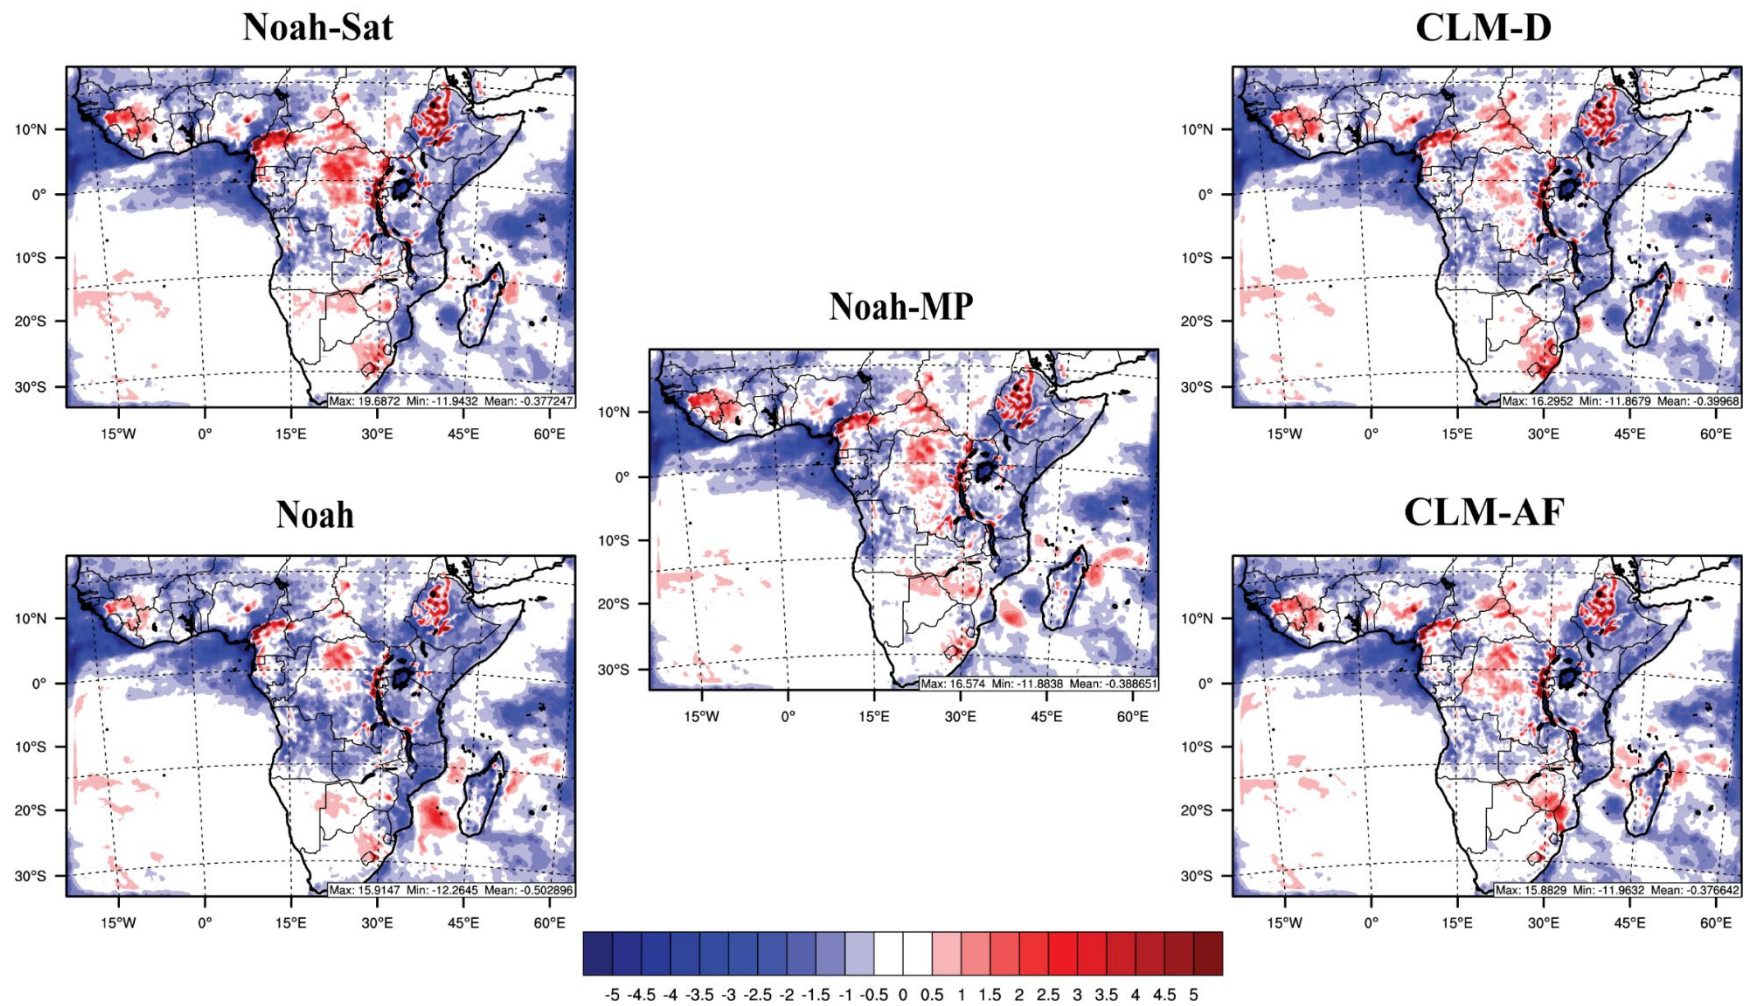

Fig S17: 2013 annual average differences in precipitation (mm day<sup>-1</sup>) between the WRF simulations and TRMM estimates (WRF - TRMM)

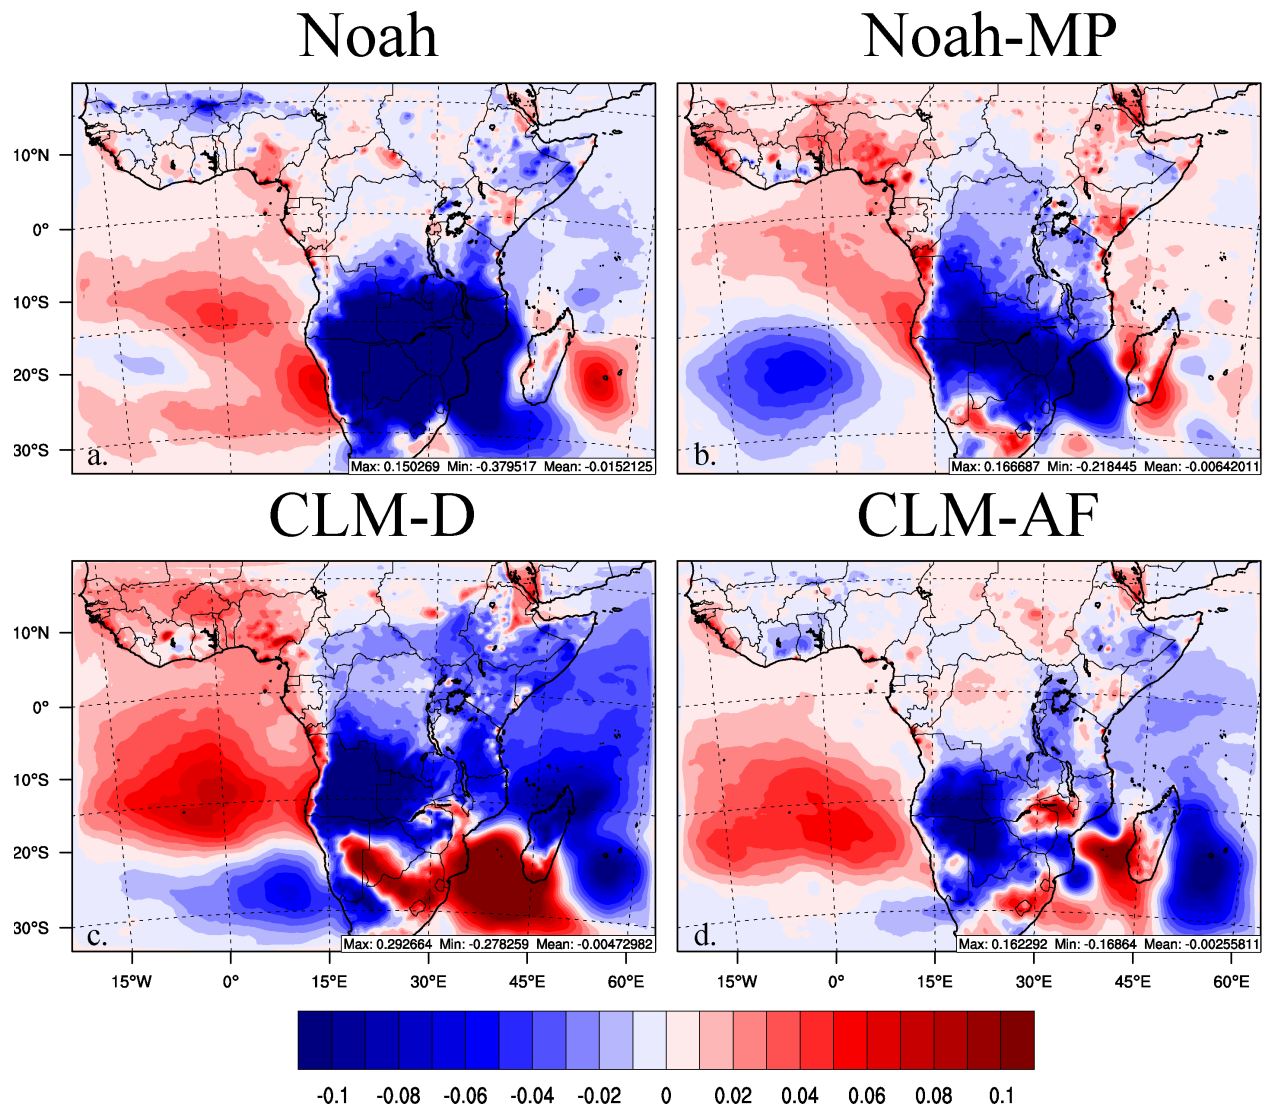

Fig S18. Differences in average DJF sea level pressure (hPa) between the dynamic and 2001 LULC simulations using (a) Noah, (b) Noah-MP, (c) CLM-D, and (d) CLM-AF

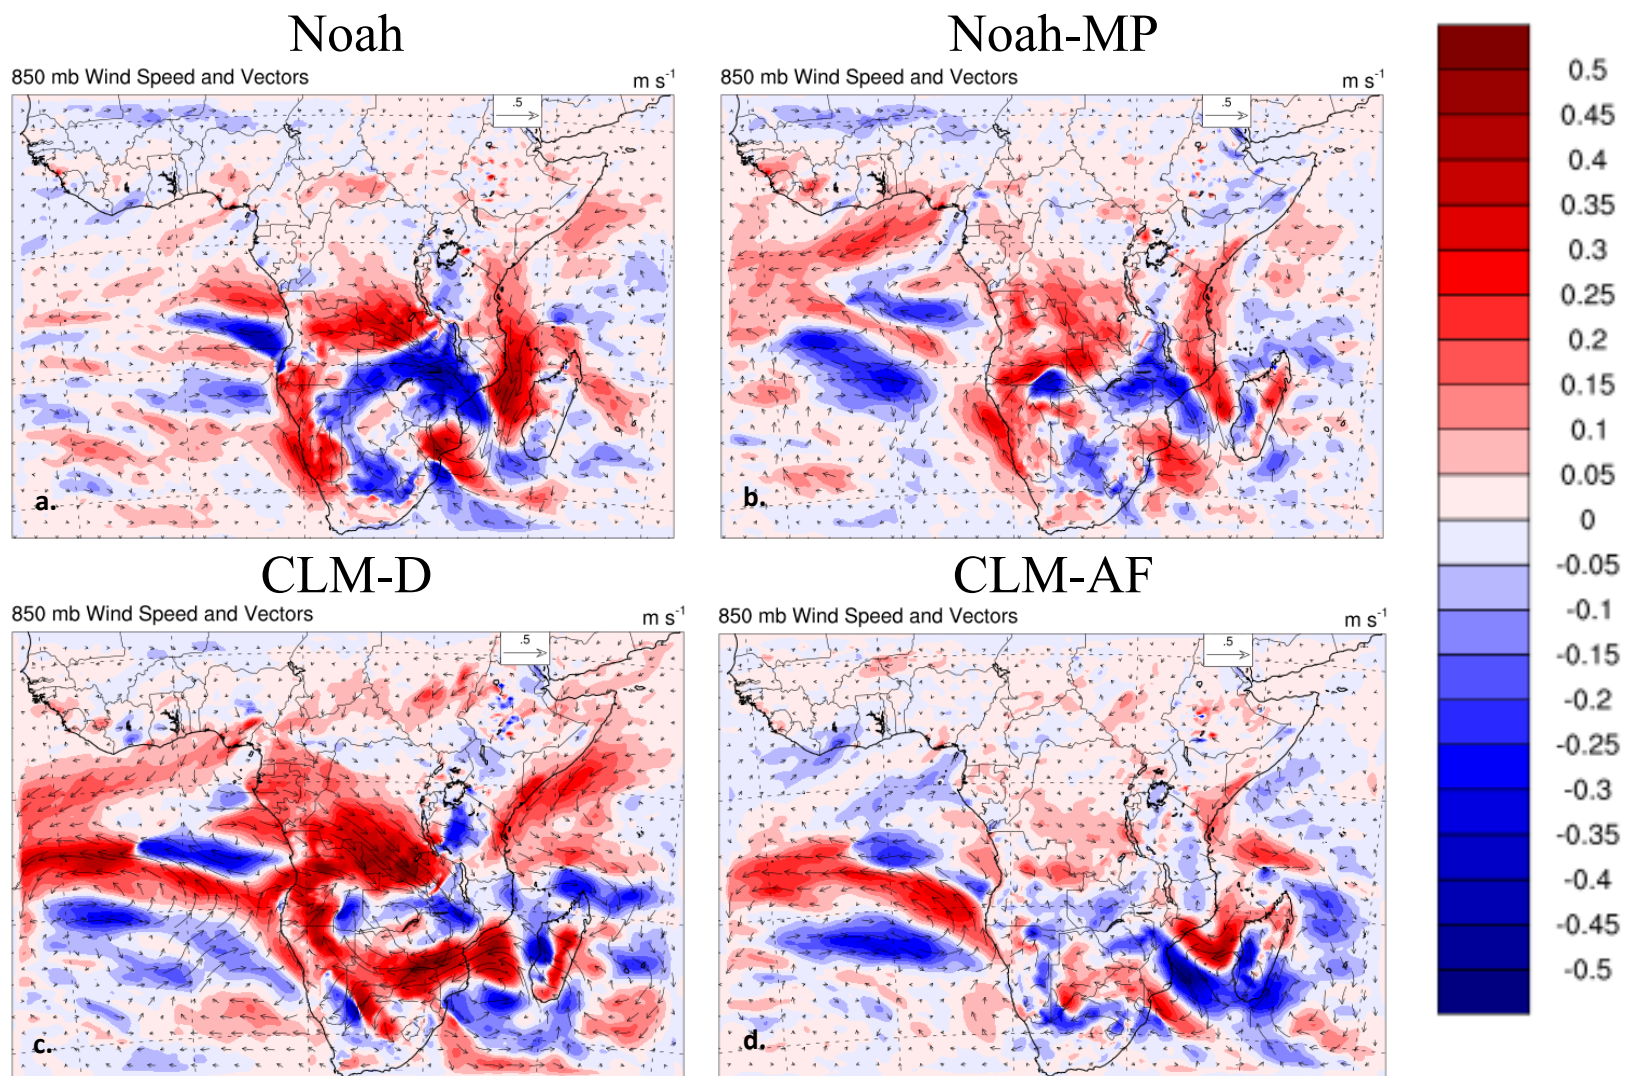

Fig S19. Differences in average DJF 850 mb wind vectors and wind speed ( $\text{m s}^{-1}$ ) between the dynamic and 2001 LULC simulations using (a) Noah, (b) Noah-MP, (c) CLM-D, and (d) CLM-AF
